# Supplementary material for: Financial costs and personal consequences of research misconduct resulting in retracted publications
Source: eLife. 2014 Aug 14;3:e02956. doi: 10.7554/eLife.02956 (PMC4132287; doi:10.7554/eLife.02956)
Supplement: Figure 1—source data 1. — DOI: http://dx.doi.org/10.7554/eLife.02956.003 [file elife02956s001.xlsx]

## Sheet: Sheet1
First Author	Last Author	Title	Journal	ISSN	Yr of Publication	Yr of Retraction	Months to Retraction	PMID	Impact Factor	5-year Impact Factor, year of publication; bold = 1-year IF; used 1999 IF for papers before 1999	Grant number(total grant size, #papers citing)	Grants, duplicates removed	Attributable $	Attributable $, 2012 dollars	Total for all cited grants, non-duplicate grants	Total for all cited grants, non-duplicate grants, 2012 dollars	All NIH, all accounted for in ExPORTER?
Abramson JS	Givner LB	Development of a vaccine tracking system to improve the rate of age-appropriate primary immunization in children of lower socioeconomic status.	J Pediatr	0022-3476	1995	1995	4	7699537	4.197	3.22	Supported by Merck Sharpe and Dohme	Supported by Merck Sharpe and Dohme	0	0	0	0
Arichi T	Berzofsky JA	Prophylactic DNA vaccine for hepatitis C virus (HCV) infection: HCV-specific cytotoxic T lymphocyte induction and protection from HCV-recombinant vaccinia infection in an HLA-A2.1 transgenic mouse model	Proc Natl Acad Sci U S A	0027-8424	2000	2001	16	10618412	10.472	10.789	no grants cited	no grants cited	0	0	0	0
Arnold SF	McLachlan JA	Synergistic activation of estrogen receptor with combinations of environmental chemicals.	Science	0036-8075	1996	1997	13	8633243	32.452	24.595	Unavailable	need "science classic" subscription	0	0	0	0
Aronica SM	Broxmeyer HE	Macrophage inflammatory protein-1alpha and interferon-inducible protein 10 inhibit synergistically induced growth factor stimulation of MAP kinase activity and suppress phosphorylation of eukaryotic initiation factor 4E and 4E binding protein 1.	Blood	0006-4971	1997	2006	109	9160663	9.785	8.872	R01HL56416(5075353,184) R37CA36464(683654,104) R01HL49202(1109122,64) R01HL54037(1017382,54) T32DK07519(4204318,75)	R01HL56416(5075353,184) R37CA36464(683654,104) R01HL49202(1109122,64) R01HL54037(1017382,54) T32DK07519(4204318,75)	126385	180793	12089829	17294406	Y
Asiedu CK	Thomas JM	Elevated T regulatory cells in long-term stable transplant tolerance in rhesus macaques induced by anti-CD3 immunotoxin and deoxyspergualin	J Immunol	0022-1767	2005	2006	8	16339543	5.859	6.387	DK057958(13694133,26) AI056542-02(3533661,10) Juvenile Diabetes Research Foundation Grant 4-2004-364	DK057958(13694133,26) AI056542-02(3533661,10) Juvenile Diabetes Research Foundation Grant 4-2004-364	880064	1.0346e+06	17227794	202529
Azghadi S	Clark AT	Epigenetically reprogramming of human embryonic stem cells by 3-deazaneplanocin a and sodium butyrate.	Int J Prev Med	not found	2011	2011	3	21603011	0.1	0.1	no grants cited	no grants cited	0	0	0	0
Badawi AF	Badr MZ	Inhibition of rat mammary gland carcinogenesis by simultaneous targeting of cyclooxygenase-2 and peroxisome proliferator-activated receptor gamma	Cancer Res	0008-5472	2004	2005	19	14871855	8.164	7.69	CA06927(149454119,1705) CA97473(168000,1) CA57708(5205088,30) and appropriations from Commonwealth of Pennsylvania	CA06927(149454119,1705) CA97473(168000,1) CA57708(5205088,30) and appropriations from Commonwealth of Pennsylvania	429159	521611	154827207	1.88181e+06
Baglia FA	Walsh PN	The glycoprotein Ib-IX-V complex mediates localization of factor XI to lipid rafts on the platelet membrane	J Biol Chem	0021-9258	2003	2007	51	12517745	5.117	6.482	HL46213(7678684,77) HL64943(6536968,52) HL56914(5694995,49) HL54218(912762,7) HL64796(1868125,11)	HL56914(5694995,49) HL54218(912762,7) HL64796(1868125,11)	641883	800937	8475882	1.05762e+07	Y
Baglia FA	Walsh PN	Factor XI binding to the platelet glycoprotein Ib-IX-V complex promotes factor XI activation by thrombin	J Biol Chem	0021-9258	2002	2007	68	11696542	5.117	6.696	HL46213(7678684,77) HL64943(6536968,52) HL56914(5694995,49) HL54218(912762,7) and HL64796(1868125,11)		641883	819191	0	0	Y
Baglia FA	Walsh PN	Thrombin-mediated feedback activation of factor XI on the activated platelet surface is preferred over contact activation by factor XIIa or factor XIa	J Biol Chem	0021-9258	2000	2007	86	10781579	5.117	7.368	HL57530(713109,3) HL46213(7678684,77) HL64943(6536968,52) HL70683(1500000,17) P5065967(?)	P5065967(?)	551372	735144	0	0
Baglia FA	Walsh PN	Prothrombin is a cofactor for the binding of factor XI to the platelet surface and for platelet-mediated factor XI activation by thrombin.	Biochemistry	0006-2960	1998	2007	117	9485373	3.249	4.493	HL46213(7678684,77) HL56153(1034026,24) HL55407(262931,6) HL56914(5694995,49)	HL55407(262931,6)	302854	426585	262931	370352	Y
Bais HP	Vivanco JM	Exudation of fluorescent beta-carbolines from Oxalis tuberosa L roots.	Phytochemistry	0031-9422	2002	2010	86	12409020	3.527	1.686	Colorado State University funding and NSF Career award	Colorado State University funding and NSF Career award	0	0	0	0
Blocki FA	Pease LR	Induction of a gene expression program in dendritic cells with a cross-linking IgM antibody to the co-stimulatory molecule B7-DC.	FASEB J	0892-6638	2006	2010	43	17023390	6.34	6.721	article not available	article not available	0	0	0	0
Bois PR	Grosveld GC	FOXO1a acts as a selective tumor suppressor in alveolar rhabdomyosarcoma	J Cell Biol	0021-9525	2005	2007	20	16157701	9.947	10.951	CA71907(16385932,122) CA87952(2409942,8) CA96696(1201500,18) CA23099(35134740,606) CA21765(98184091,4553) the Van Vleet Foundation of Memphis, and the American Lebanese Syrian Associated Charities	CA71907(16385932,122) CA87952(2409942,8) CA96696(1201500,18) CA23099(35134740,606) CA21765(98184091,4553) the Van Vleet Foundation of Memphis, and the American Lebanese Syrian Associated Charities	581846	684017	153316205	180237997
Bonnefoi H	Iggo RD	Validation of gene signatures that predict the response of breast cancer to neoadjuvant chemotherapy: a substudy of the EORTC 10994/BIG 00-01 clinical trial.	Lancet Oncol	1470-2045	2007	2011	38	18024211	18.74	10.77	Mostly Swiss sources, though NIH listed (no grant #s)	Mostly Swiss sources, though NIH listed (no grant #s)	0	0	0	0
Brodie SJ	Corey L	HIV-specific cytotoxic T lymphocytes traffic to lymph nodes and localize at sites of HIV replication and cell death.	J Clin Invest	0021-9738	2000	2010	124	10811848	15.43	12.015	AI36613(6113479,13) AI41535(11816687,48) AI30731(30384561,257) AI18029(648119,13)	AI36613(6113479,13) AI41535(11816687,48) AI30731(30384561,257) AI18029(648119,13)	884532	1.17934e+06	48962846	65282089	Y
Brodie SJ		Nonlymphoid reservoirs of HIV replication in children with chronic-progressive disease	J Leukoc Biol	0741-5400	2000	2008	90	10985251	4.73	4.342	AI36613(6113479,13) AI41535(11816687,48) AI30731(30384561,257) AI18029(648119,13)		884532	1.17934e+06	0	0	Y
Bruns MB	Miller MW	Functional nerve growth factor and trkA autocrine/paracrine circuits in adult rat cortex are revealed by episodic ethanol exposure and withdrawal.	J Neurochem	0022-3042	2007	2012	60	17316397	4.201	4.561	AA06916(4464770,80) AA07568(4736162,77) AA15245(90198,2) and Veteran's Affairs	AA06916(4464770,80) AA07568(4736162,77) AA15245(90198,2) and Veteran's Affairs	162417	179848	9291130	1.02883e+07
Chan SK	Struhl G	Evidence that Armadillo transduces wingless by mediating nuclear export or cytosolic activation of Pangolin	Cell	0092-8674	2002	2004	16	12408870	34.774	27.254	HHMI	HHMI	0	0	0	0
Chandok MR	Klessig DF	Suppression of pathogen-inducible NO synthase (iNOS) activity in tomato increases susceptibility to Pseudomonas syringae	Proc Natl Acad Sci U S A	0027-8424	2004	2004	6	15146069	10.472	10.452	GM067011(1076379,4) and NSF DBI-0116076 and Swedish Research Council	GM067011(1076379,4) and NSF DBI-0116076 and Swedish Research Council	269095	327065	1076379	1.30826e+06
Chandok MR	Klessig DF	The pathogen-inducible nitric oxide synthase (iNOS) in plants is a variant of the P protein of the glycine decarboxylase complex	Cell	0092-8674	2003	2004	17	12757708	34.774	26.626	The Park and Triad Foundations and National Science Foundation grant MCB-0110404	The Park and Triad Foundations and National Science Foundation grant MCB-0110404	0	0	0	0
Chang HS	Skinner MK	Transgenerational epigenetic imprinting of the male germline by endocrine disruptor exposure during gonadal sex determination	Endocrinology	0013-7227	2006	2009	30	16973722	4.62	5.236	NIH EHS grant # not indicated	NIH EHS grant # not indicated	0	0	0	0
Chen H	Sperber K	Chronically HIV-1-infected monocytic cells induce apoptosis in cocultured T cells.	J Immunol	0022-1767	1998	2006	97	9780201	5.859	7.145	R-29-256990(?,?) RR03037(37425076,516) Irma T. Hirschl Career Development Trust	R-29-256990(?,?) RR03037(37425076,516) Irma T. Hirschl Career Development Trust	72529.2	102161	37425076	52715171
Chen L	Woo SL	Site-specific transgene integration in the human genome catalyzed by phiBT1 phage integrase.	Hum Gene Ther	1043-0342	2008	2010	30	18067406	3.963	4.062	article not available	article not available	0	0	0	0
Chen L	Woo SL	Correction in female PKU mice by repeated administration of mPAH cDNA using phiBT1 integration system.	Mol Ther	1525-0016	2007	2010	38	17637719	6.284	5.24	"Partially supported" by DK62972(1327843,1)	"Partially supported" by DK62972(1327843,1)	1327843	1.47035e+06	1327843	1.47035e+06
Chen L	Woo SL	Metabolic basis of sexual dimorphism in PKU mice after genome-targeted PAH gene therapy.	Mol Ther	1525-0016	2007	2010	42	17406346	6.284	5.24	no grants cited	no grants cited	0	0	0	0
Chen L	Woo SL	Complete and persistent phenotypic correction of phenylketonuria in mice by site-specific genome integration of murine phenylalanine hydroxylase cDNA.	Proc Natl Acad Sci U S A	0027-8424	2005	2010	58	16230623	10.472	10.231	no grants cited	none cited	0	0	0	0
Chu W	Raz E	DNA-PKcs is required for activation of innate immunity by immunostimulatory DNA	Cell	0092-8674	2000	2009	98	11136976	34.774	32.44	AI40682(3617052,23) AI43477(892482,13) CA59609(?,1) and CA78497(753176,4) CA505159(?,?) Dynavax Technologies Corp, Cancer Research Institute Postdoctoral Fellowship, tobacco-related disease researhch program 9KT-00567, California Cancer Research Program	AI40682(3617052,23) AI43477(892482,13) CA59609(?,1) and CA78497(753176,4) CA505159(?,?) Dynavax Technologies Corp, Cancer Research Institute Postdoctoral Fellowship, tobacco-related disease researhch program 9KT-00567, California Cancer Research Program	414210	552265	5262710	7.01676e+06
Constantoulakis P	Pavlakis GN	Inhibition of Rev-mediated HIV-1 expression by an RNA binding protein encoded by the interferon-inducible 9-27 gene.	Science	0036-8075	1993	1994	14	7680491	32.452	24.595	Unavailable	no access to "Science Classic"	0	0	0	0
Contreras JL	Thomas JM	Tolerability and side effects of anti-CD3-immunotoxin in preclinical testing in kidney and pancreatic islet transplant recipients.	Transplantation	0041-1337	1999	2008	133	10440390	3.689	3.463	AII22293 corrected to AI22293(2664733,54) AI39793(2117549,20) a Novartis CRADA, and JDF grant	AI39793(2117549,20) a Novartis CRADA, and JDF grant	155224	213917	2117549	2.91823e+06
Contreras JL	Thomas JM	Peritransplant tolerance induction with anti-CD3-immunotoxin: a matter of proinflammatory cytokine control.	Transplantation	0041-1337	1998	2008	118	9603161	3.689	3.463	AII22293 corrected to AI22293(2664733,54) AI39793(2117549,20)		155224	218642	0	0	Y
Cooper PK	Leadon SA	Defective transcription-coupled repair of oxidative base damage in Cockayne syndrome patients from XP group G.	Science	0036-8075	1997	2005	100	9020084	32.452	24.595	CA63503(5219750,12) CA40453(1930115,17) DOE contract DE-AC03-76SF00098 and Swiss National Science Foundation (31-36482.92)	DOE contract DE-AC03-76SF00098 and Swiss National Science Foundation (31-36482.92)	548515	784647	0	0
Cressman VL	Koller BH	Growth retardation, DNA repair defects, and lack of spermatogenesis in BRCA1-deficient mice.	Mol Cell Biol	0270-7306	1999	2006	86	10490643	5.766	9.866	CA70490(144500,4) CA58223(49231618,236) CA40453(1930115,17) and the Department of Defense USAMRMC grant DAMD17-97-1-7102	CA70490(144500,4) CA58223(49231618,236)and the Department of Defense USAMRMC grant DAMD17-97-1-7102	358270	493737	49376118	68045981
Crowther LJ	Donnenberg MS	The ATPase activity of BfpD is greatly enhanced by zinc and allosteric interactions with other Bfp proteins	J Biol Chem	0021-9258	2005	2009	48	15866879	5.117	5.854	AI37606(3430690,32) AI22160(4425073,22) (J.A.T.) and a fellowship from The Canadian Institutes of Health Research and a fellowship from HFSP	AI37606(3430690,32) AI22160(4425073,22) (J.A.T.) and a fellowship from The Canadian Institutes of Health Research and a fellowship from HFSP	308349	362494	7855763	9.23521e+06
Das S	Das DK	Cardioprotective effect of resveratrol via HO-1 expression involves p38 map kinase and PI-3-kinase signaling, but does not involve NFkappaB.	Free Radic Res	1071-5762	2006	2012	65	17015251	2.745	2.536	Unavailable	No access from Penn	0	0	0	0
Deb K	Roberts RM	Cdx2 gene expression and trophectoderm lineage specification in mouse embryos	Science	0036-8075	2006	2007	17	16484492	32.452	30.028	HD21896(4387176,84) HD42201(1505843,16) RR13438(2808762,72)	HD21896(4387176,84) HD42201(1505843,16) RR13438(2808762,72)	185354	211092	8701781	9.9101e+06	Y
Deschenes LA	Vanden Bout DA	Single-molecule studies of heterogeneous dynamics in polymer melts near the glass transition	Science	0036-8075	2001	2006	60	11303094	32.452	23.329	Research corporation and Henry Dreyfuss Foundation	Research corporation and Henry Dreyfuss Foundation	0	0	0	0
Dhillon HS	Prasad RM	Kynurenate attenuates the accumulation of diacylglycerol and free fatty acids after experimental brain injury in the rat.	Brain Res	0006-8993	1999	2003	45	10375646	2.739	2.302	NS34264(994213,18) and Surgery Dept. UKentucky	NS34264(994213,18) and Surgery Dept. UKentucky	55234.1	76118.9	994213	1.37014e+06
Doree SM	Mulks,MH	Identification of an Actinobacillus pleuropneumoniae consensus promoter structure	J Bacteriol	0021-9193	2001	2003	29	11222596	3.924	3.984	USDA CSREES grant 98-02202	USDA CSREES grant 98-02202	0	0	0	0
Doughan DI	Komanduri R	Theoretical investigation of the dissociation dynamics of vibrationally excited vinyl bromide on an ab initio potential-energy surface obtained using modified novelty sampling and feed-forward neural networks	J Chem Phys	0021-9606	2006	2006	6	16468883	3.238	3.166	NSF and DoD	NSF and DoD	0	0	0	0
Dressman HK	Lancaster JM	An integrated genomic-based approach to individualized treatment of patients with advanced-stage ovarian cancer.	J Clin Oncol	0732-183X	2007	2012	60	17290060	16.76	13.753	Supported by the Ovarian Cancer Research Fund, Gynecologic Cancer Foundation's Molly Cade Ovarian Cancer Award, Hearing the Ovarian Cancer Whisper Organization, and the Jacquie Liggett Fellowship in Ovarian Cancer Research.	Supported by the Ovarian Cancer Research Fund, Gynecologic Cancer Foundation's Molly Cade Ovarian Cancer Award, Hearing the Ovarian Cancer Whisper Organization, and the Jacquie Liggett Fellowship in Ovarian Cancer Research.	0	0	0	0
Duan L	Pomerantz RJ	Potent inhibition of human immunodeficiency virus type 1 replication by an intracellular anti-Rev single-chain antibody.	Proc Natl Acad Sci U S A	0027-8424	1994	1998	51	8197188	10.472	10.26	in part by AI31836(636585,26) and W. W. Smith Charitable Trust and a grant from American Biotechnologies	in part by AI31836(636585,26) and W. W. Smith Charitable Trust and a grant from American Biotechnologies	24484	37931.1	636585	986208
Dudley JI	Das DK	Does white wine qualify for French paradox? Comparison of the cardioprotective effects of red and white wines and their constituents: resveratrol, tyrosol, and hydroxytyrosol.	J Agric Food Chem	0021-8561	2008	2012	41	18821770	3.239	3.165	"in part by" HL22559(4578375,208) HL33889(?,163) HL69910(3378343,47)	"in part by"	93891.1	100123	0	0
Essner R		Experimental frontiers for clinical applications: novel approaches to understanding mechanisms of lymph node metastases in melanoma	Cancer Metastasis Rev	0167-7659	2006	2008	27	16770538	10.339	6.115	Review	Review	0	0	0	0
Fogel RB	White DP	Anatomic and physiologic predictors of apnea severity in morbidly obese subjects	Sleep	0161-8105	2003	2009	73	12683472	5.051	3.547	RR02635(76589505,547) HL60292(17660429,79) HL48531(4836153,66) HL04400(669600,7) the Pickwick Fellowship from the National Sleep Foundation and grants from the Medical Research Council of Canada and the American Heart Association	RR02635(76589505,547) HL60292(17660429,79) HL48531(4836153,66) HL04400(669600,7) the Pickwick Fellowship from the National Sleep Foundation and grants from the Medical Research Council of Canada and the American Heart Association	532499	664449	99755687	124474496
Freschi SA	Dodson N	Analysis of compression forces between varying sizes of cannulated screws versus rail external fixation for treatment of Jones type fifth metatarsal fracture.	J Foot Ankle Surg	not found	2008	2009	14	18590891	0.516	not found	Unavailable	article not available	0	0	0	0
Friedman AJ	Thomas PP	Does low-dose combination oral contraceptive use affect uterine size or menstrual flow in premenopausal women with leiomyomas?	Obstet Gynecol	0029-7844	1995	1995	7	7898846	4.718	2.122	"In part by" RR02635-01(76648905,548)	"In part by"	139870	210718	0	0
Friedman AJ	Hornstein MD	Gonadotropin-releasing hormone agonist plus estrogen-progestin add-back" therapy for endometriosis-related pelvic pain."	Fertil Steril	0015-0282	1993	1996	29	8339817	3.84	2.955	Unavailable	not available online	0	0	0	0
Garey CE	Seyfried TN	Ceruloplasmin gene defect associated with epilepsy in EL mice.	Nat Genet	1061-4036	1994	1995	17	7914452	33.096	30.693	NS23355(601181,14) and Boston College	NS23355(601181,14) and Boston College	42941.5	66525.7	601181	931360
Garman KS	Potti A	A genomic approach to colon cancer risk stratification yields biologic insights into therapeutic opportunities.	Proc Natl Acad Sci U S A	0027-8424	2008	2011	30	19050079	10.472	10.228	internal NIH, and grants not indicated	internal NIH, and grants not indicated	0	0	0	0
Gelband CH	Raizada MK	Angiotensin I-converting enzyme antisense prevents altered renal vascular reactivity, but not high blood pressure, in spontaneously hypertensive rats	Hypertension	0194-911X	2000	2002	33	10642299	6.643	5.311	HL52189(927423,25) HL56921(9953331,57) and a grant-in-aid from the American Heart Association, Florida affiliate	HL52189(927423,25) HL56921(9953331,57) and a grant-in-aid from the American Heart Association, Florida affiliate	211717	282282	10880754	14507293
Gelband CH	Raizada MK	Angiotensin II type 1 receptor antisense gene therapy prevents altered renal vascular calcium homeostasis in hypertension.	Hypertension	0194-911X	1999	2004	61	9931130	6.643	4.913	HL52189(927423,25) HL56921(9953331,57) the Council for Tobacco Research, and the American Heart Association, Florida Affiliate	the Council for Tobacco Research, and the American Heart Association, Florida Affiliate	211717	291770	0	0
Gelband CH	Hume JR	[Ca2+]i inhibition of K+ channels in canine renal artery. Novel mechanism for agonist-induced membrane depolarization.	Circ Res	0009-7330	1995	2004	102	7788870	10.037	8.281	HL49254(4362512,38) HL08531(58500,3) DK41315(27047720,283)	HL49254(4362512,38) HL08531(58500,3) DK41315(27047720,283)	229878	346316	31468732	47408347	Y
Geraghty MT	Gould SJ	Detecting patterns of protein distribution and gene expression in silico.	Proc Natl Acad Sci U S A	0027-8424	1999	2005	70	10077615	10.472	10.26	DK45787(6308026,44) and institutional from Hopkins Pediatrics Dept.	DK45787(6308026,44) and institutional from Hopkins Pediatrics Dept.	143364	197572	6308026	8.69319e+06
Ghatnekar GS	Smoak IW	Hypoglycemia induced changes in cell death and cell proliferation in the organogenesis stage embryonic mouse heart	Birth Defects Res A Clin Mol Teratol	1542-0752	2004	2006	25	15039926	2.738	0.91	HL60752(908584,4) and American Heart Association	HL60752(908584,4) and American Heart Association	227146	276079	908584	1.10432e+06
Gilligan DM	Wooden JM	Comparative proteomics reveals deficiency of NHE-1 (Slc9a1) in RBCs from the beta-adducin knockout mouse model of hemolytic anemia.	Blood Cells Mol Dis	1079-9796	2011	2012	6	21592827	2.361	2.361	5F32HL079771-02(172608,1) P41RR011823(29168026,493) R01DK069386(2071680,26) T32HG00035(13454387,123)	5F32HL079771-02(172608,1) P41RR011823(29168026,493) R01DK069386(2071680,26) T32HG00035(13454387,123)	420838	429547	44866701	47286768	Y
Gold JE	Osband ME	Autolymphocyte therapy. III. Effective adjuvant adoptive cellular therapy with in vivo anti-tumor specificity against murine melanoma and carcinoma using ex-vivo-activated memory T-lymphocytes.	J Surg Res	0022-4804	1995	1998	30	7543632	2.202	1.429	Grants from Cellcor and the Jennifer Turner Cancer Research Foundation	Grants from Cellcor and the Jennifer Turner Cancer Research Foundation	0	0	0	0
Gold JE	Osband ME	Autolymphocyte therapy--I. In vivo tumour-specific adoptive cellular therapy of murine melanoma and carcinoma using ex vivo activated memory T-lymphocytes.	Eur J Cancer	0959-8049	1994	1998	42	7880620	4.781	2.537	Unavailable	not available online	0	0	0	0
Gold JE	Osband ME	Adoptively transferred ex vivo activated memory T cells with cyclophosphamide: effective tumor-specific chemoimmunotherapy of advanced metastatic murine melanoma and carcinoma.	Clin Immunol Immunopathol		1994	1998	44	7923908	3.893		Cellcor and the Jennifer Turner Cancer Research Foundation	Cellcor and the Jennifer Turner Cancer Research Foundation	0	0	0	0
Gold JE	Osband ME	Autolymphocyte therapy. II. Dependence of in vivo anti-tumor specificity and long-term immunity against murine melanoma and carcinoma on ex vivo activated donor memory T-cells.	Clin Immunol Immunopathol		1994	1998	48	7911078	3.893		Cellcor and the Jennifer Turner Cancer Research Foundation	Cellcor and the Jennifer Turner Cancer Research Foundation	0	0	0	0
Goodwill MH	Seegal RF	Polychlorinated biphenyls induce proinflammatory cytokine release and dopaminergic dysfunction: protection in interleukin-6 knockout mice	J Neuroimmunol	0165-5728	2007	2008	16	17229471	3.024	2.973	5R21ES013269-02(352608,?)	5R21ES013269-02(352608,?)	0	0	352608	390450
Gowen LC	Leadon SA	BRCA1 required for transcription-coupled repair of oxidative DNA damage.	Science	0036-8075	1998	2003	58	9703501	32.452	24.595	CA70490(144500,4) CA58223(45890117,236) CA40453(1930115,17)		344111	484698	0	0	Y
Greger JG	Cheskis BJ	Phosphorylation of MNAR promotes estrogen activation of phosphatidylinositol 3-kinase.	Mol Cell Biol	0270-7306	2007	2010	36	17194752	5.766	6.825	no grants cited	no grants cited	0	0	0	0
Gu P	Cooney AJ	Differential recruitment of methylated CpG binding domains by the orphan receptor GCNF initiates the repression and silencing of Oct4 expression	Mol Cell Biol	0270-7306	2006	2009	28	17030610	5.766	6.773	DK073524-01(877404,5) HD07165(5878504,60)	DK073524-01(877404,5) HD07165(5878504,60)	273456	311428	6755908	7.69403e+06	Y
Guilleminault C	Li K	Orthodontic expansion treatment and adenotonsillectomy in the treatment of obstructive sleep apnea in prepubertal children.	Sleep	0161-8105	2008	2010	18	18652090	5.051	5.236	no grants cited	no grants listed	0	0	0	0
Gupta A	Fraser NW	Anti-apoptotic function of a microRNA encoded by the HSV-1 latency-associated transcript	Nature	0028-0836	2006	2008	18	16738545	36.235	26.681	NIH grant not specified; NSF training grant not specified	NIH grant not specified; NSF training grant not specified	0	0	0	0
Hajra A	Collins FS	Overexpression of core-binding factor alpha (CBF alpha) reverses cellular transformation by the CBF beta-smooth muscle myosin heavy chain chimeric oncoprotein.	Mol Cell Biol	0270-7306	1995	1996	15	7651416	5.766	9.866	"a portion of this work supported by" CA58343-01(4572992,30)	"a portion of this work supported by" CA58343-01(4572992,30)	152433	229644	4572992	6.88931e+06
Hajra A	Collins FS	Structure of the leukemia-associated human CBFB gene.	Genomics	0888-7543	1995	1996	19	7607682	2.958	3.386	no grants cited	no grants cited	0	0	0	0
Hajra A	Collins FS	The leukemic core binding factor beta-smooth muscle myosin heavy chain (CBF beta-SMMHC) chimeric protein requires both CBF beta and myosin heavy chain domains for transformation of NIH 3T3 cells.	Proc Natl Acad Sci U S A	0027-8424	1995	1996	21	7892201	10.472	10.26	CA58343-01(4572992,30)		152433	229644	0	0	Y
Handa A	Brown KE	GB virus C/hepatitis G virus replicates in human haematopoietic cells and vascular endothelial cells	J Gen Virol	0022-1317	2000	2001	13	10993934	3.334	3.126	no grants cited	no grants cited	0	0	0	0
Hard BM	Tversky B	Hierarchical encoding of behavior: translating perception into action	J Exp Psychol Gen	not found	2006	2008	24	17087575	6.098	not found	Office of Naval Research N000140210534 and N000140110717	Office of Naval Research N000140210534 and N000140110717	0	0	0	0
Hauser MD	Marcus G	Rule learning by cotton-top tamarins.	Cognition	not found	2002	2010	95	12208654	4.16	not found	RR00168-37(202068834,798) Mind, Brain and Behavior program at Harvard and the National Science Foundation and NIH grants not specified	RR00168-37(202068834,798) Mind, Brain and Behavior program at Harvard and the National Science Foundation and NIH grants not specified	253219	323166	202068834	257886558
Hennein HA	Gold JP	Venovenous modified ultrafiltration after cardiopulmonary bypass in children: a prospective randomized study.	J Thorac Cardiovasc Surg	0022-5223	2009	2010	12	10047653	3.52	3.431	Appears article was published in 1999, retracted in 2000?	Appears article was published in 1999, retracted in 2000?	0	0	0	0
Hoffmann B	Morris NR	The LIS1-related protein NUDF of Aspergillus nidulans and its interaction partner NUDE bind directly to specific subunits of dynein and dynactin and to alpha- and gamma-tubulin	J Biol Chem	0021-9258	2001	2004	27	11509576	5.117	7.258	GM52309(2585091,14) and by the Deutsche Forschungsgemeinschaft	GM52309(2585091,14) and by the Deutsche Forschungsgemeinschaft	184649	239381	2585091	3.35133e+06
Horvath EM	Elmendorf JS	A novel membrane-based anti-diabetic action of atorvastatin.	Biochem Biophys Res Commun	0006-291X	2008	2010	26	18514061	2.523	2.823	no grants cited	no grants listed	0	0	0	0
Horvath EM	Elmendorf JS	Antidiabetogenic effects of chromium mitigate hyperinsulinemia-induced cellular insulin resistance via correction of plasma membrane cholesterol imbalance.	Mol Endocrinol	0888-8809	2008	2010	26	18165437	4.816	5.432	R01AT001846(1414226,18) F31AT003977(104982,3), American Diabetes Association Research Award 7-05-RA-37, American Heart Association Midwest predoctoral fellowship 0615574Z	R01AT001846(1414226,18) F31AT003977(104982,3), American Diabetes Association Research Award 7-05-RA-37, American Heart Association Midwest predoctoral fellowship 0615574Z	113562	121100	1519208	1.62005e+06
Hsu DS	Potti A	Pharmacogenomic strategies provide a rational approach to the treatment of cisplatin-resistant patients with advanced cancer.	J Clin Oncol	0732-183X	2007	2010	38	17906199	16.76	13.753	no grants cited	no grants cited	0	0	0	0
Huang CF	Schmidt J	Depolarization-transcription signals in skeletal muscle use calcium flux through L channels, but bypass the sarcoplasmic reticulum.	Neuron	0896-6273	1994	1998	47	8043275	15.71	16.782	in part by NS20233(2608027,11) and grant from the Muscular Dystrophy Assoc	in part by NS20233(2608027,11) and grant from the Muscular Dystrophy Assoc	237093	367309	2608027	4.0404e+06
Hutchings A	Thomas JM	The immune decision toward allograft tolerance in non-human primates requires early inhibition of innate immunity and induction of immune regulation	Transpl Immunol	0966-3274	2003	2009	70	12967786	1.649	1.075	DK57958(13694133,26)		526697	657210	0	0	Y
Hutchings A	Thomas JM	Transplantation: tolerance.	Curr Opin Investig Drugs	not found	2003	2009	75	12833645	2.939	not found	Unavailable	cannot locate article text	0	0	0	0
Hutchings A	Thomas JM	STEALTH in transplantation tolerance	Immunol Res	0257-277X	2002	2008	72	12403353	3.167	2.391	NIAID and NIDDK grants not specified	NIAID and NIDDK grants not specified	0	0	0	0
Jayachandra S	Moore PS	Three unrelated viral transforming proteins (vIRF, EBNA2, and E1A) induce the MYC oncogene through the interferon-responsive PRF element by using different transcription coadaptors.	Proc Natl Acad Sci U S A	0027-8424	1999	2001	25	10500217	10.472	10.26	CA67391(4105161,24) CA76586(1190756,7)	CA67391(4105161,24) CA76586(1190756,7)	341156	470153	5295917	7.29838e+06	Y
Jiao S	Wolff JA	Long-term correction of rat model of Parkinson's disease by gene therapy.	Nature	0028-0836	1993	1996	36	8096625	36.235	29.491	Portions of this work supported by USDA	Portions of this work supported by USDA	0	0	0	0
Jorge-Rivera JC	Henderson LP	Anabolic steroids induce region- and subunit-specific rapid modulation of GABA(A) receptor-mediated currents in the rat forebrain	J Neurophysiol	0022-3077	2000	2007	87	10848550	3.713	3.855	NS28668(1227139,12) and NSF DBI-9707826	NS28668(1227139,12) and NSF DBI-9707826	102262	136345	1227139	1.63614e+06
Kabarowski JH	Xu Y	Lysophosphatidylcholine as a ligand for the immunoregulatory receptor G2A	Science	0036-8075	2001	2005	42	11474113	32.452	23.329	CA84038-01(222000,8) CA76204(1983525,14) CA09056(6422801,161) U.S. Army grant RPG-99-062-01-CNE ( O.N.W. is an Investigator of the Howard Hughes Medical Institute. J.H.S.K. is a fellow of the Leukemia and Lymphoma Society of America. L.Q.L. is supported by National Research Service Award T32	CA84038-01(222000,8) CA76204(1983525,14) CA09056(6422801,161) U.S. Army grant RPG-99-062-01-CNE ( O.N.W. is an Investigator of the Howard Hughes Medical Institute. J.H.S.K. is a fellow of the Leukemia and Lymphoma Society of America. L.Q.L. is supported by National Research Service Award T32	209324	271369	8628326	1.11858e+07
Kantevari S	Ellis-Davies GC	Development of anionically decorated 2-(ortho-nitrophenyl)-propyl-caged neurotransmitters for photolysis in vitro and in vivo.	Chembiochem	1439-4227	2011	2011	1	21225599	3.719	3.719	GM53395(3583936,47)	GM53395(3583936,47)	76254	77832	3583936	3.6581e+06	Y
Katz PP	Blanc PD	Perceived control of asthma: development and validation of a questionnaire.	Am J Respir Crit Care Med	1073-449X	1997	2000	43	9032197	10.424	5.491	HL48959(335487,5) HL03225(355590,22)	HL48959(335487,5) HL03225(355590,22)	83260.6	119104	691077	988580
Kindzelskii AL	Petty HR	Intracellular calcium waves accompany neutrophil polarization, formylmethionylleucylphenylalanine stimulation, and phagocytosis: a high speed microscopy study	J Immunol	0022-1767	2003	2009	73	12496384	5.859	6.702	CA74120(2465501,25)	CA74120(2465501,25)	98620	123057	2465501	3.07644e+06	Y
Kindzelskii AL	Petty HR	Apparent role of traveling metabolic waves in oxidant release by living neutrophils.	Proc Natl Acad Sci U S A	0027-8424	2002	2010	95	12082178	10.472	10.7	CA74120(2465501,25)		98620	125862	0	0	Y
Koch CA		Rapid increase in bone mineral density in a child with osteoporosis and autoimmune hypoparathyroidism treated with PTH 1-34	Exp Clin Endocrinol Diabetes	0947-7349	2001	2002	7	11571675	1.737	1.617	no grants cited	no grants cited	0	0	0	0
Kow YW	Goodman SD	Escherichia coli HU protein has a role in the repair of abasic sites in DNA	Nucleic Acids Res	0305-1048	2007	2009	20	17916578	8.026	7.163	CA90860(1090739,17) PO1ES011163(12557334,57) R01DE13965(1322345,5)	CA90860(1090739,17) PO1ES011163(12557334,57) R01DE13965(1322345,5)	548934	607846	14970418	16577047	Y
Krishna Murthy HM	Padmanabhan R	Crystallization, characterization and measurement of MAD data on crystals of dengue virus NS3 serine protease complexed with mung-bean Bowman-Birk inhibitor.	Acta Crystallogr D Biol Crystallogr	0907-4449	1999	2010	127	10393310	7.038	2.935	AI32078(1979427,20) and Johnson&Johnson focused giving grant	AI32078(1979427,20) and Johnson&Johnson focused giving grant	98971.4	136394	1979427	2.72788e+06
Kuklo TR	Islinger RB	Recombinant human bone morphogenetic protein-2 for grade III open segmental tibial fractures from combat injuries in Iraq	J Bone Joint Surg Br	0021-9355	2008	2009	7	18669965	3.405	6.279	Unavailable	article not available	0	0	0	0
Kumar DM	Agarwal N	Estrogens and neuroprotection in retinal diseases	Mol Vis	1090-0535	2008	2008	3	18698377	2.513	2.615	AG10485(18448819,208) AG22550(14204663,108) AG020494(2238531,21) and National Glaucoma Program of the American Health Assistance Foundation	AG10485(18448819,208) AG22550(14204663,108) AG020494(2238531,21) and National Glaucoma Program of the American Health Assistance Foundation	326818	348511	34892013	37208013
Kumar R	Damodaran C	Psoralidin, an herbal molecule, inhibits phosphatidylinositol 3-kinase-mediated Akt signaling in androgen-independent prostate cancer cells.	Cancer Prev Res (Phila)	1940-6207	2009	2011	32	19223576	5.181	6.153	R01AT002890(1072501,4) and University of Kentucky Research Foundation grants	R01AT002890(1072501,4) and University of Kentucky Research Foundation grants	268125	286943	1072501	1.14777e+06
Kupfer Y	Tessler S	Chest tube drainage of transudative pleural effusions hastens liberation from mechanical ventilation.	Chest	0012-3692	2011	2012	10	20688921	6.224	6.224	no grants cited	no grants cited	0	0	0	0
Kwon E	Kim S	An investigation into the impact of CO2 co-feed on pyrolysis and gasification.	Chemosphere	0045-6535	2010	2011	7	20546843	3.613	3.559	no grants cited	no grants cited	0	0	0	0
Le Page F	Cooper PK	Transcription-coupled repair of 8-oxoguanine: requirement for XPG, TFIIH, and CSB and implications for Cockayne syndrome	Cell	0092-8674	2000	2005	67	10786832	34.774	32.44	Association pour la Recherche sur le Cancer CA63503(5219600,12) CA40453(1930115,17) French Ministry of Science, Electricite de France, and DOE contract DE-AC03-76SF00098	Association pour la Recherche sur le Cancer CA63503(5219600,12) CA40453(1930115,17) French Ministry of Science, Electricite de France, and DOE contract DE-AC03-76SF00098	548503	731318	7149715	9.5327e+06
Leadon SA	Avrutskaya AV	Requirement for DNA mismatch repair proteins in the transcription-coupled repair of thymine glycols in Saccharomyces cerevisiae.	Mutat Res	0921-8262	1998	2003	60	9637246	3.133	2.107	Unavailable	article missing online	0	0	0	0
Leadon SA	Avrutskaya AV	Differential involvement of the human mismatch repair proteins, hMLH1 and hMSH2, in transcription-coupled repair.	Cancer Res	0008-5472	1997	2003	70	9288788	8.164	8.614	CA40453(1930115,17)		113536	162413	0	0	Y
Leadon SA	Dunn AB	The yeast RAD2, but not RAD1, gene is involved in the transcription-coupled repair of thymine glycols.	Mutat Res	0921-8262	1995	2006	133	7491120	3.133	2.107	CA40453(1930115,17)		113536	171045	0	0	Y
Lee YK	Kay NE	VEGF receptors on chronic lymphocytic leukemia (CLL) B cells interact with STAT 1 and 3: implication for apoptosis resistance.	Leukemia	0887-6924	2005	2010	60	15703780	8.205	6.612	CA95241(5717533,31) and philanthropic support from Edson Spencer	CA95241(5717533,31) and philanthropic support from Edson Spencer	184437	216823	5717533	6.72151e+06
Leman ES	Getzenberg RH	EPCA-2: a highly specific serum marker for prostate cancer.	Urology	0090-4295	2007	2012	58	17445657	2.306	2.583	CA65463(576060,6) and Onconome Inc.;	CA65463(576060,6) and Onconome Inc.;	96010	106314	576060	637883
Leone JE		Muscle dysmorphia symptomatology and extreme drive for muscularity in a 23-year-old woman: a case study	J Strength Cond Res	1064-8011	2009	2009	3	19387376	2.338	2.561	no grants cited	no grants cited	0	0	0	0
Lerner JS	Taylor SE	Facial expressions of emotion reveal neuroendocrine and cardiovascular stress responses	Biol Psychiatry	0006-3223	2005	2007	14	16256075	9.247	6.779	MH6237602(?,2) MH056880(1250210,27) MH067346(1488750,26) and NSF PECASE SES-0239637 and the Fetzer Foundation	MH6237602(?,2) MH056880(1250210,27) MH067346(1488750,26) and NSF PECASE SES-0239637 and the Fetzer Foundation	103564	121749	2738960	3.21991e+06
Lilly JW	Stern DB	The Chlamydomonas reinhardtii organellar genomes respond transcriptionally and post-transcriptionally to abiotic stimuli	Plant Cell	1040-4651	2002	2004	16	12417695	10.224	10.751	National Science Foundation Grant MCB 9975765 and NIH NRSA not specified	National Science Foundation Grant MCB 9975765 and NIH NRSA not specified	0	0	0	0
Lin J	Low WC	Directed differentiation of mouse cochlear neural progenitors in vitro	Am J Physiol Cell Physiol	0363-6143	2009	2009	9	19261910	3.97	4.128	R01DC008165(1570240,17) P30CD04660(?,5) R03CA107989(148500,11) and Academic Health Center seed grant and 5M Lions International Hearing Foundation	R01DC008165(1570240,17) P30CD04660(?,5) R03CA107989(148500,11) and Academic Health Center seed grant and 5M Lions International Hearing Foundation	105867	113297	1718740	1.83937e+06
Lipsky R	Diversé-Pierluissi MA	beta-Adrenergic receptor activation induces internalization of cardiac Cav1.2 channel complexes through a beta-arrestin 1-mediated pathway.	J Biol Chem	0021-9258	2008	2011	36	18458091	5.117	5.575	NS37443(2346515,9) HL076230(2656042,25) HL7458(?,2) and American Heart Assoc	NS37443(2346515,9) HL076230(2656042,25) HL7458(?,2) and American Heart Assoc	366966	391323	5002557	5.33461e+06
Liu G	Lin Y	Voltammetric detection of Cr(VI) with disposable screen-printed electrode modified with gold nanoparticles	Environ Sci Technol	0013-936X	2007	2008	4	18186348	5.764	4.93	1R01 ES010976-01A2(245616,7) and DOE	1R01 ES010976-01A2(245616,7) and DOE	35088	38853.7	245616	271976	Y
Liu H	Yao Z	Role of opioid delta1 receptors, mitochondrial K(ATP) channels, and protein kinase C during cardiocyte apoptosis	J Mol Cell Cardiol	0022-2828	2001	2003	16	11708844	4.988	3.396	HL03881(425278,14) HL67416(?,2) HL68250(?,1)	HL03881(425278,14) HL67416(?,2) HL68250(?,1)	30377	39381	425278	551334
Liu X	Curtiss R 3d	Production and secretion of fatty acids in genetically engineered cyanobacteria.	Proc Natl Acad Sci U S A	0027-8424	2010	2010	0	20351245	10.472	10.591	Funded by DOE, internal sources	Funded by DOE, internal sources	0	0	0	0
Lobashevsky AL	Thomas JM	Allele-specific in situ analysis of microchimerism by fluorescence resonance energy transfer (FRET) in nonhuman primate tissues	Hum Immunol	0198-8859	2002	2008	82	11821158	2.732	2.573	no grants cited	no grants cited	0	0	0	0
Lombardi VC	Mikovits JA	Detection of an infectious retrovirus, XMRV, in blood cells of patients with chronic fatigue syndrome.	Science	0036-8075	2009	2011	24	19815723	32.452	31.052	CA104943(?,2) NIH contract HHSN26120080001E, DoD Prostate Cancer Research Program W81XWH-07-1338, V Foundation for Cancer Research, Charlotte Geyer Foundation, and Mal and Lea Blank	CA104943(?,2) NIH contract HHSN26120080001E, DoD Prostate Cancer Research Program W81XWH-07-1338, V Foundation for Cancer Research, Charlotte Geyer Foundation, and Mal and Lea Blank	0	0	0	0
Lozano SC	Tversky B	Putting motor resonance in perspective	Cognition	Not found	2008	2009	10	17662266	4.16	not found	Grant N000140210534 (NSF?)	Grant N000140210534 (NSF?)	0	0	0	0
Lozano SC	Tversky B	Putting action in perspective	Cognition	not found	2007	2009	19	16765339	4.16	not found	Office of Naval Research N000140210534	Office of Naval Research N000140210534	0	0	0	0
Lozano SC	Tversky B	Perspective taking promotes action understanding and learning	J Exp Psychol Hum Percept Perform	0096-1523	2006	2008	22	17154781	3.759	2.261	Office of Naval Research N00014-PP-1-O649, N000140210534 and N000140110717	Office of Naval Research N00014-PP-1-O649, N000140210534 and N000140110717	0	0	0	0
Luettich K	Schmidt C	TGFbeta1 activates c-Jun and Erk1 via alphaVbeta6 integrin	Mol Cancer	not found	2003	2004	4	14572313	4.597	not found	German Research Foundation	German Research Foundation	0	0	0	0
Machado FS	Aliberti J	Native and aspirin-triggered lipoxins control innate immunity by inducing proteasomal degradation of TRAF6	J Exp Med	0022-1007	2008	2009	17	18411340	14.665	15.504	AI075038(1674477,3) HL079312(2034920,5) GM38765(7830594,196) P50DE16191(13609051,137), grant from CCHMC (Trustee Grant/CFF-RDP center)	AI075038(1674477,3) HL079312(2034920,5) GM38765(7830594,196) P50DE16191(13609051,137), grant from CCHMC (Trustee Grant/CFF-RDP center)	1.10443e+06	1.17774e+06	25149042	26818340
Maeda F	Iacoboni M	Experience-dependent modulation of motor corticospinal excitability during action observation	Exp Brain Res	0014-4819	2001	2002	12	11521156	2.533	2.306	RR12169(740836,136) Brain Mapping Medical Research Organization, Abramson Foundation, Pierson-Lovelace Foundation, Tamkin Foundation, Jennifer Jones-Simon Foundation, Capital Group Companies Charitable Foundation, Robson Family, Northstar Fund	RR12169(740836,136) Brain Mapping Medical Research Organization, Abramson Foundation, Pierson-Lovelace Foundation, Tamkin Foundation, Jennifer Jones-Simon Foundation, Capital Group Companies Charitable Foundation, Robson Family, Northstar Fund	5447.32	7061.95	740836	960426
Malik G	Das DK	Ischemic preconditioning triggers nuclear translocation of thioredoxin and its interaction with Ref-1 potentiating a survival signal through the PI-3-kinase-Akt pathway.	Antioxid Redox Signal	1523-0864	2006	2012	65	17034353	7.615	4.491	Unavailable	article not available	0	0	0	0
Mandal PK	Mandal R	Molecular understanding of Abeta peptide interaction with isoflurane, propofol, and thiopental: NMR spectroscopic study	Biochemistry	0006-2960	2007	2007	10	17223697	3.249	3.444	no grants cited	no grants cited	0	0	0	0
Mandal PK	Mandal R	Alzheimer's disease: halothane induces Abeta peptide to oligomeric form--solution NMR studies	Neurochem Res	0364-3190	2006	2008	18	16807784	2.398	2.139	Supported by American Health Assistance Foundation, American Parkinson Disease Association, U Pitt	Supported by American Health Assistance Foundation, American Parkinson Disease Association, U Pitt	0	0	0	0
Marik PE		The failure of a once-daily vancomycin dosing regimen in patients with normal renal function.	J Antimicrob Chemother	0305-7453	1997	1999	15	9421334	4.792	3.296	no grants cited	no grants cited	0	0	0	0
Martens JR	Gelband CH	Prevention of renovascular and cardiac pathophysiological changes in hypertension by angiotensin II type 1 receptor antisense gene therapy.	Proc Natl Acad Sci U S A	0027-8424	1998	2004	79	9482944	10.472	10.26	HL52189(927423,25) HL56921(9953331,57) and the Council for Tobacco Research and a predoctoral fellowship from the American Heart Association	and the Council for Tobacco Research and a predoctoral fellowship from the American Heart Association	211717	298214	0	0
Matsuyama W	Yoshimura T	Interaction of discoidin domain receptor 1 isoform b (DDR1b) with collagen activates p38 mitogen-activated protein kinase and promotes differentiation of macrophages	FASEB J	0892-6638	2003	2009	74	12738814	6.34	7.172	no grants cited	no grants cited	0	0	0	0
Mayack SR	Wagers AJ	Systemic signals regulate ageing and rejuvenation of blood stem cell niches.	Nature	0028-0836	2010	2010	9	20110993	36.235	35.248	1DP2OD004345-01(2430000,4) T32DK07260(6517916,106) P30DK036836(32192708,593) and Burroughs-Wellcome Fund, WM Keck Foundation, Iacocca Foundation	1DP2OD004345-01(2430000,4) T32DK07260(6517916,106) P30DK036836(32192708,593) and Burroughs-Wellcome Fund, WM Keck Foundation, Iacocca Foundation	723278	761548	41140624	43317498
Mayack SR	Wagers AJ	Osteolineage niche cells initiate hematopoietic stem cell mobilization.	Blood	0006-4971	2008	2012	42	18456874	9.785	9.691	T32DK07260(6517916,106), Smith Family Medical Foundation, Paul F. Glenn Laboratories, and Burroughs Wellcome Fund Career Award	Smith Family Medical Foundation, Paul F. Glenn Laboratories, and Burroughs Wellcome Fund Career Award	61489.8	65571.2	0	0
Mi QS	She JX	The autoimmune regulator (Aire) controls iNKT cell development and maturation	Nat Med	1078-8956	2006	2006	3	16732280	26.418	28.588	American Diabetes Association, NIH, CIHR grants not specified	American Diabetes Association, NIH, CIHR grants not specified	0	0	0	0
Motlekar NA	Youan BB	Zonula occludens toxin synthetic peptide derivative AT1002 enhances in vitro and in vivo intestinal absorption of low molecular weight heparin	J Drug Target	1061-186X	2006	2008	29	16882552	3.018	1.699	GM069397-01A2(221887,6) and Texas Tech	GM069397-01A2(221887,6) and Texas Tech	36981.2	42116.3	221887	252698
Motlekar NA	Youan BB	Oral delivery of low-molecular-weight heparin using sodium caprate as absorption enhancer reaches therapeutic levels	J Drug Target	1061-186X	2005	2008	35	16390818	3.018	1.569	GM069397-01A2(221887,6) and internal funding	and internal funding	36981.2	43474.9	0	0
Muenchen HJ	Pienta KJ	Different docetaxel-induced apoptotic pathways are present in prostate cancer cell lines LNCaP and PC-3	Urology	0090-4295	2001	2003	28	11182366	2.306	2.762	CaPCURE and SPORE grant CA69568(43359215,452)	CaPCURE and SPORE grant CA69568(43359215,452)	95927.5	124361	43359215	56211268
Muenchen HJ	Pienta KJ	Tumor necrosis factor-alpha-induced apoptosis in prostate cancer cells through inhibition of nuclear factor-kappaB by an IkappaBalpha "super-repressor"	Clin Cancer Res	1078-0432	2000	2002	31	10815922	7.508	4.643	CaPCURE and SPORE Grant P50 CA69568(41382882,452)	CaPCURE and SPORE Grant	91555	122070	0	0
Muinck ED	Das DK	Protection against myocardial ischemia-reperfusion injury by the angiogenic Masterswitch protein PR 39 gene therapy: the roles of HIF1alpha stabilization and FGFR1 signaling.	Antioxid Redox Signal	1523-0864	2007	2012	60	17280485	7.615	4.933	Unavailable	not available online	0	0	0	0
Mukherjee S	Das DK	Freshly crushed garlic is a superior cardioprotective agent than processed garlic.	J Agric Food Chem.	0021-8561	2009	2012	31	19722587	3.239	3.051	HL22559(4578375,208) HL33889(?,163) HL69910(3378343,47) and a travel grant from the Indo-US Science and Technology Forum	HL22559(4578375,208) HL33889(?,163) HL69910(3378343,47) and a travel grant from the Indo-US Science and Technology Forum	93891.1	100481	7956718	8.51515e+06
Mukherjee S	Das DK	Broccoli: a unique vegetable that protects mammalian hearts through the redox cycling of the thioredoxin superfamily.	J Agric Food Chem	0021-8561	2008	2012	50	18163565	3.239	3.165	HL34360(4954125,144) HL22559(4578375,208) HL33889(?,163)	HL34360(4954125,144)	56415.1	60159.7	4954125	5.28296e+06
Murthy HM	Padmanabhan R	Crystal structure of Dengue virus NS3 protease in complex with a Bowman-Birk inhibitor: implications for flaviviral polyprotein processing and drug design.	J Mol Biol	0022-2836	2000	2010	116	10966782	3.981	5.388	Johnson & Johnson Focused Giving grant	Johnson & Johnson Focused Giving grant	0	0	0	0
Murthy HM	Padmanabhan R	Dengue virus NS3 serine protease. Crystal structure and insights into interaction of the active site with substrates by molecular modeling and structural analysis of mutational effects.	J Biol Chem	0021-9258	1999	2009	130	10026173	5.117	7.666	AI32078(1979427,20) American Cancer Society Grant IRG 204 (to K. M.) and the Johnson & Johnson Foundation (to R. P.)	American Cancer Society Grant IRG 204 (to K. M.) and the Johnson & Johnson Foundation (to R. P.)	98971.4	136394	0	0
Nezhat F	Ambroze W Jr.	Laparoscopic segmental resection for infiltrating endometriosis of the rectosigmoid colon: a preliminary report.	Surg Laparosc Endosc	1051-7200	1992	2001	101	1341533	1.099	0.974	Unavailable	No access from Penn	0	0	0	0
Nguele JC	Fujita M	Genetic and biochemical analyses of sensor kinase A in Bacillus subtilis sporulation.	Genet Mol Res	1676-5680	2010	2011	14	20391342	1.161	1.013	Supported by UH-DBB (University of Houston?) contract WO5856-9	Supported by UH-DBB (University of Houston?) contract WO5856-9	0	0	0	0
Nguyen LT	Pease LR	Cross-linking the B7 family molecule B7-DC directly activates immune functions of dendritic cells.	J Exp Med	0022-1007	2002	2010	89	12438431	14.665	15.837	CA97085(3535412,32) and Ralph C. Wilson Jr. and Sr. Foundations	CA97085(3535412,32) and Ralph C. Wilson Jr. and Sr. Foundations	110482	141000	3535412	4.512e+06
Nunez E	Fu XD	Nuclear receptor-enhanced transcription requires motor- and LSD1-dependent gene networking in interchromatin granules	Cell	0092-8674	2008	2008	4	18358812	34.774	30.149	CA52599(6598573,29) HL088129(379598,4) GM049369(5684091,28) CA114184(1566220,4) CA97134(3175078,16) DK39949(10351051,32) NS34934(8633308,30), HHMI, Prostate Cancer Research Foundation grant USA MRMC PC04052, and the Vitamin Cases Research Fund	CA52599(6598573,29) HL088129(379598,4) GM049369(5684091,28) CA114184(1566220,4) CA97134(3175078,16) DK39949(10351051,32) NS34934(8633308,30), HHMI, Prostate Cancer Research Foundation grant USA MRMC PC04052, and the Vitamin Cases Research Fund	1.72668e+06	1.8413e+06	36387919	38803212
Nuttall FQ	Hoover H	Glycemic response to ingested dreamfields pasta compared with traditional pasta.	Diabetes Care	0149-5992	2011	2011	7	21270176	7.424	7.424	Funded by Veterans Affairs (grant not cited)	Funded by Veterans Affairs (grant not cited)	0	0	0	0
Orme IM	Weiser WY	Inhibition of growth of Mycobacterium avium in murine and human mononuclear phagocytes by migration inhibitory factor.	Infect Immun	0019-9567	1993	1994	16	8418058	4.055	4.184	AI30189(3828374,36) AI18471(2167416,29) AI22801(680233,5) and a grant from Genetics Institute Boston MA	AI30189(3828374,36) AI18471(2167416,29) AI22801(680233,5) and a grant from Genetics Institute Boston MA	317129	503881	6676023	1.06074e+07
Paul S	Kruh GD	ATP-dependent transport of lipophilic cytotoxic drugs by membrane vesicles prepared from MRP-overexpressing HL60/ADR cells.	Biochemistry	0006-2960	1996	1997	12	8909298	3.249	4.493	CA63173(789374,10) CA06927(143095033,1705) Betz Foundation grant and an appropriation from Commonwealth of Pennsylvania and Fox Chase	CA63173(789374,10)Betz Foundation grant and an appropriation from Commonwealth of Pennsylvania and Fox Chase	162864	238321	789374	1.1551e+06
Paul S	Kruh GD	Structure and in vitro substrate specificity of the murine multidrug resistance-associated protein.	Biochemistry	0006-2960	1996	1997	13	8885844	3.249	4.493	CA63173(789374,10) CA06927(143095033,1705) Betz Foundation grant and an appropriation from Commonwealth of Pennsylvania and Fox Chase	Betz Foundation grant and an appropriation from Commonwealth of Pennsylvania and Fox Chase	162864	238321	0	0
Paul S	Kruh GD	ATP-dependent uptake of natural product cytotoxic drugs by membrane vesicles establishes MRP as a broad specificity transporter.	Proc Natl Acad Sci U S A	0027-8424	1996	1997	17	8692921	10.472	10.26	CA63173(789374,10) CA06927(143095033,1705) Betz Foundation grant and an appropriation from Commonwealth of Pennsylvania and Fox Chase	Betz Foundation grant and an appropriation from Commonwealth of Pennsylvania and Fox Chase	162864	238321	0	0
Pavelko KD	Pease LR	CTL activation using the natural low-affinity epitope 222-229 from tyrosinase-related protein 1 leads to tumor rejection.	Cancer Res	0008-5472	2009	2010	19	19276379	8.164	8.194	R01CA104996(2157672,18) T32AI07425(2172612,13)	T32AI07425(2172612,13)	286995	307137	2172612	2.32509e+06	Y
Pavelko KD	Pease LR	An effective vaccine strategy protective against antigenically distinct tumor variants.	Cancer Res	0008-5472	2008	2010	31	18381456	8.164	7.89	R01CA104996(2157672,18)		119871	127827	0	0	Y
Petty HR	Kindzelskii AL	Dissipative metabolic patterns respond during neutrophil transmembrane signaling.	Proc Natl Acad Sci U S A	0027-8424	2001	2010	111	11248046	10.472	10.896	CA74120(2465501,25)		98620	127852	0	0	Y
Pins JJ	Keenan JM	Effects of whey peptides on cardiovascular disease risk factors	J Clin Hypertens (Greenwich)	not found	2006	2008	21	17086017	1.83	not found	Funded by Davisco Foods and NIH grant not specified	Funded by Davisco Foods and NIH grant not specified	0	0	0	0
Poehlman ET		Menopause, energy expenditure, and body composition	Acta Obstet Gynecol Scand	0001-6349	2002	2005	40	12190834	1.754	1.241	AG13978(1853781,22) The United States Department of Agriculture 35200–3488 and GCRC-RR-109	AG13978(1853781,22) The United States Department of Agriculture 35200–3488 and GCRC-RR-109	84262.8	107539	1853781	2.36585e+06
Poehlman ET	Rosen CJ	Menopause-associated changes in plasma lipids, insulin-like growth factor I and blood pressure: a longitudinal study.	Eur J Clin Invest	0014-2972	1997	2005	97	9134381	2.797	1.922	AG07857(809720,83) AG00564(364544,67) T32AG00219(3284572,82) RR109	AG07857(809720,83) AG00564(364544,67) T32AG00219(3284572,82) RR109	55252.4	79038.1	4458836	6.37833e+06
Poehlman ET	Gardner AW	Changes in energy balance and body composition at menopause: a controlled longitudinal study.	Ann Intern Med	0003-4819	1995	2003	95	7574222	17.035	10.097	Unavailable	No access from Penn	0	0	0	0
Poehlman ET	Calles-Escandon J	Effects of endurance training on total fat oxidation in elderly persons.	J Appl Physiol	8750-7587	1994	2005	134	7928848	4.103	2.081	AG07857(809720,83) AG00564(364544,67) AG05564(28600,18) DK01963(285480,7) grants from American Diabetes Assoc, USDA, NICHD grant not specified	AG05564(28600,18) DK01963(285480,7) grants from American Diabetes Assoc, USDA, NICHD grant not specified	57568.4	89185.9	314080	486578
Poehlman ET	Goran MI	Influence of endurance training on energy intake, norepinephrine kinetics, and metabolic rate in older individuals.	Metabolism		1992	2005	156	1518423	2.772		Unavailable	not available online	0	0	0	0
Potti A	Nevins JR	Genomic signatures to guide the use of chemotherapeutics.	Nat Med	1078-8956	2006	2011	50	17057710	26.418	28.588	NCI-U54CA112952-02(12354026,51) R01CA106520(2325703,21) and GlaxoSmithKline, Sanofi-Aventis, Orthobiotech, Ovarian Cancer Research Fund, Hearing the Ovarian Cancer Whisper Jacquie Liggett Fellowship	NCI-U54CA112952-02(12354026,51) R01CA106520(2325703,21) and GlaxoSmithKline, Sanofi-Aventis, Orthobiotech, Ovarian Cancer Research Fund, Hearing the Ovarian Cancer Whisper Jacquie Liggett Fellowship	352984	401999	14679729	16718143
Potti A	Nevins JR	A genomic strategy to refine prognosis in early-stage non-small-cell lung cancer.	N Engl J Med	0028-4793	2006	2011	55	16899777	50.075	51.296	no grants cited	grants not cited	0	0	0	0
Potti A	Ortel TL	Gene-expression patterns predict phenotypes of immune-mediated thrombosis.	Blood	0006-4971	2006	2011	68	16263789	9.785	10.37	U18DD00014(?,21) U54HL077878(5738944,19) R01HL072208(2866660,1)	U18DD00014(?,21) U54HL077878(5738944,19) R01HL072208(2866660,1)	3.16871e+06	3.60871e+06	8605604	9.80057e+06
Prabhakaran K	Hendricks RL	Sensory neurons regulate the effector functions of CD8+ T cells in controlling HSV-1 latency ex vivo	Immunity	1074-7613	2005	2006	6	16286019	21.094	15.156	EY05945(7429658,33) EY08098(9448628,416) NS50905-01(87019,2) EY015291(2620296,13) unrestricted grant from Research to Prevent Blindness, and the Eye and Ear Foundation of Pittsburgh	EY05945(7429658,33) EY08098(9448628,416) NS50905-01(87019,2) EY015291(2620296,13) unrestricted grant from Research to Prevent Blindness, and the Eye and Ear Foundation of Pittsburgh	492925	579481	19585601	23024764
Puckerin A	Diversé-Pierluissi MA	Arrestin is required for agonist-induced trafficking of voltage-dependent calcium channels.	J Biol Chem	0021-9258	2006	2011	56	16912040	5.117	5.808	NS37443(2346515,9) R24 CA095823(1293878,203) and NSF DBI-9724504 and Hirschl Trust Fund Career Development Award	R24 CA095823(1293878,203) and NSF DBI-9724504 and Hirschl Trust Fund Career Development Award	267098	304187	1293878	1.47354e+06
Radhakrishnan S	Pease LR	Indirect recruitment of a CD40 signaling pathway in dendritic cells by B7-DC cross-linking antibody modulates T cell functions.	PLoS One	1932-6203	2009	2010	11	19399172	4.537	4.383	CA104996(2157672,18) HL077296(1457594,5)	CA104996(2157672,18) HL077296(1457594,5)	411389	440262	3615266	3.869e+06	Y
Radhakrishnan S	Pease LR	TREM-2 mediated signaling induces antigen uptake and retention in mature myeloid dendritic cells.	J Immunol	0022-1767	2008	2010	18	19017976	5.859	6.165	CA104996(2157672,18) HL077296(1457594,5) CA96859(766500,8) and Ralph Wilson Medical Research Foundation	CA96859(766500,8) and Ralph Wilson Medical Research Foundation	507202	540868	766500	817377
Radhakrishnan S	Pease LR	Reprogrammed FoxP3+ T regulatory cells become IL-17+ antigen-specific autoimmune effectors in vitro and in vivo.	J Immunol	0022-1767	2008	2010	21	18713984	5.859	6.165	CA104996(2157672,18) HL077296(1457594,5)		411389	438696	0	0	Y
Radhakrishnan S	Pease LR	Induction of a Th1 response from Th2-polarized T cells by activated dendritic cells: dependence on TCR:peptide-MHC interaction, ICAM-1, IL-12, and IFN-gamma.	J Immunol	0022-1767	2007	2010	39	17339455	5.859	6.277	CA96859(766500,8) CA104996(2157672,18) HL077296(1457594,5) DK64194(599130,2)	DK64194(599130,2)	806767	893349	599130	663429	Y
Radhakrishnan S	Pease LR	B7-DC/PD-L2 cross-linking induces NF-kappaB-dependent protection of dendritic cells from cell death.	J Immunol	0022-1767	2007	2010	40	17237390	5.859	6.277	no grants cited	no grants cited	0	0	0	0
Radhakrishnan S	Pease LR	Dendritic cells activated by cross-linking B7-DC (PD-L2) block inflammatory airway disease.	J Allergy Clin Immunol	0091-6749	2005	2010	56	16159641	9.712	2.402	AI49235(4808376,31)	AI49235(4808376,31)	155109	182345	4808376	5.65271e+06	Y
Radhakrishnan S	Pease LR	B7-DC cross-linking restores antigen uptake and augments antigen-presenting cell function by matured dendritic cells.	Proc Natl Acad Sci U S A	0027-8424	2005	2010	57	16061819	10.472	10.231	P50CA91956(23421310,185) CA103921(1249045,23) CA80782(2800578,37) CA096859(766500,8) CA104996(2157672,18)	P50CA91956(23421310,185) CA103921(1249045,23) CA80782(2800578,37)	472282	555214	27470933	32294733	Y
Radhakrishnan S	Pease LR	Blockade of allergic airway inflammation following systemic treatment with a B7-dendritic cell (PD-L2) cross-linking human antibody.	J Immunol	0022-1767	2004	2010	71	15240731	5.859	6.486	Grant from Ralph C. Wilson Jr. and Sr. foundation	Grant from Ralph C. Wilson Jr. and Sr. foundation	0	0	0	0
Radhakrishnan S	Pease LR	Immunotherapeutic potential of B7-DC (PD-L2) cross-linking antibody in conferring antitumor immunity.	Cancer Res	0008-5472	2004	2010	76	15256470	8.164	7.69	Grant from Ralph C. Wilson Jr. and Sr. foundation	Grant from Ralph C. Wilson Jr. and Sr. foundation	0	0	0	0
Radhakrishnan S	Pease LR	Naturally occurring human IgM antibody that binds B7-DC and potentiates T cell stimulation by dendritic cells.	J Immunol	0022-1767	2003	2010	88	12574348	5.859	6.702	CA62242(17280920,339) and Ralph C. Wilson Jr. and Sr. Foundations	CA62242(17280920,339) and Ralph C. Wilson Jr. and Sr. Foundations	50976.2	63607.7	17280920	21563019
Rakoff-Nahoum S	Sperber K	Regulation of class II expression in monocytic cells after HIV-1 infection	J Immunol	0022-1767	2001	2006	63	11490022	5.859	7.065	CAR-29-256990(?,2) AI44236(16256292,100) AI45343(1755991,11) RR09145-01(249000,157) and the Irma T. Hirschl Career Development Trust and National Science Foundation Major Research Instrumentation Grant DB1-9724504	CAR-29-256990(?,2) and the Irma T. Hirschl Career Development Trust and National Science Foundation Major Research Instrumentation Grant DB1-9724504	323784	419757	0	0
Ramalingam TS	Bjorkman PJ	IgG transcytosis and recycling by FcRn expressed in MDCK cells reveals ligand-induced redistribution	EMBO J	0261-4189	2002	2002	9	11847107	8.833	10.698	GM41239(2797128,37) and the W.M.Keck Foundation Fund for Discovery in Basic Medical Research	GM41239(2797128,37) and the W.M.Keck Foundation Fund for Discovery in Basic Medical Research	75598.1	96480.6	2797128	3.56978e+06
Ramalingam TS	Bjorkman PJ	Binding to the transferrin receptor is required for endocytosis of HFE and regulation of iron homeostasis	Nat Cell Biol	1465-7392	2000	2003	31	11146662	20.116	11.939	DK54488(4264077,24) W. M. Keck Foundation Fund for Discovery in Basic Medical Research (to P.J.B.), and the Cancer Research Fund of the Damon Runyon-Walter Winchell Foundation (grant no. DRG-1445 to A.P.W.)	DK54488(4264077,24) W. M. Keck Foundation Fund for Discovery in Basic Medical Research (to P.J.B.), and the Cancer Research Fund of the Damon Runyon-Walter Winchell Foundation (grant no. DRG-1445 to A.P.W.)	177670	236887	4264077	5.68529e+06
Reaves PY	Raizada MK	Permanent cardiovascular protection from hypertension by the AT(1) receptor antisense gene therapy in hypertensive rat offspring.	Circ Res	0009-7330	1999	2004	50	10559146	10.037	8.281	HL52189(927423,25) HL56921(9953331,57) and AHA postdoctoral fellowships	and AHA postdoctoral fellowships	211717	291770	0	0
Reddy MA	Natarajan R	Role of the lysine-specific demethylase 1 in the proinflammatory phenotype of vascular smooth muscle cells of diabetic mice	Circ Res	0009-7330	2008	2009	12	18688044	10.037	10.445	NIH grants not specified and predoctoral fellowship from Myrtle Carr Foundation and Junior Faculty Award from American Diabetes Association	NIH grants not specified and predoctoral fellowship from Myrtle Carr Foundation and Junior Faculty Award from American Diabetes Association	0	0	0	0
Reese EL	Haimo LT	Dynein, dynactin, and kinesin II's interaction with microtubules is regulated during bidirectional organelle transport	J Cell Biol	0021-9525	2000	2003	28	11018061	9.947	13.955	National Science Foundation grants MCB 94-05763 and MCB 97-27728	National Science Foundation grants MCB 94-05763 and MCB 97-27728	0	0	0	0
Reuben SS	Kroin JS	A prospective randomized trial on the role of perioperative celecoxib administration for total knee arthroplasty: improving clinical outcomes	Anesth Analg	0003-2999	2008	2009	12	18349203	3.069	2.439	funding from Pfizer and institution	funding from Pfizer and institution	0	0	0	0
Reuben SS	Charron D	Evaluating the analgesic efficacy of administering celecoxib as a component of multimodal analgesia for outpatient anterior cruciate ligament reconstruction surgery	Anesth Analg	0003-2999	2007	2009	21	17578978	3.069	2.144	funding from Pfizer and institution	funding from Pfizer and institution	0	0	0	0
Reuben SS	Ekman EF	The effect of initiating a preventive multimodal analgesic regimen on long-term patient outcomes for outpatient anterior cruciate ligament reconstruction surgery	Anesth Analg	0003-2999	2007	2009	21	17578979	3.069	2.144	funding from Pfizer and institution	funding from Pfizer and institution	0	0	0	0
Reuben SS	Buvanendran A	Preventing the development of chronic pain after orthopaedic surgery with preventive multimodal analgesic techniques	J Bone Joint Surg Am	0021-9355	2007	2009	22	17545440	4.289	1.493	no grants cited	no grants cited	0	0	0	0
Reuben SS	Raghunathan K	The analgesic efficacy of celecoxib, pregabalin, and their combination for spinal fusion surgery	Anesth Analg	0003-2999	2006	2009	29	17056968	3.069	2.131	no grants cited	grants not cited	0	0	0	0
Reuben SS	Steinberg RB	Postoperative modulation of central nervous system prostaglandin E2 by cyclooxygenase inhibitors after vascular surgery	Anesthesiology	0003-3022	2006	2009	36	16508386	5.19	4.207	solely institutional	solely institutional	0	0	0	0
Reuben SS	Wenner S	The incidence of complex regional pain syndrome after fasciectomy for Dupuytren's contracture: a prospective observational study of four anesthetic techniques	Anesth Analg	0003-2999	2006	2009	38	16428550	3.069	2.131	grants not cited	grants not cited	0	0	0	0
Reuben SS	Adesioye J	The effect of cyclooxygenase-2 inhibition on acute and chronic donor-site pain after spinal-fusion surgery	Reg Anesth Pain Med	1098-7339	2006	2009	38	16418018	3.479	2.056	institutional and Pfizer	institutional and Pfizer	0	0	0	0
Reuben SS	Ekman EF	The effect of cyclooxygenase-2 inhibition on analgesia and spinal fusion	J Bone Joint Surg Am	0021-9355	2005	2009	49	15741619	4.289	2.339	Pfizer and not otherwise specified	Pfizer and not otherwise specified	0	0	0	0
Reuben SS	Kilaru PA	Surgery on the affected upper extremity of patients with a history of complex regional pain syndrome: the use of intravenous regional anesthesia with clonidine	J Clin Anesth	0952-8180	2004	2009	54	15590255	1.354	1.208	no grants cited	no grants cited	0	0	0	0
Reuben SS	Lurie SD	Evaluation of efficacy of the perioperative administration of venlafaxine XR in the prevention of postmastectomy pain syndrome	J Pain Symptom Manage	0885-3924	2004	2009	63	15157037	3.106	2.187	Rays of Hope Foundation and Wyeth-Ayerst Labs	Rays of Hope Foundation and Wyeth-Ayerst Labs	0	0	0	0
Reuben SS	Maciolek H	Evaluation of the safety and efficacy of the perioperative administration of rofecoxib for total knee arthroplasty.	J Arthroplasty	0883-5403	2002	2010	96	11805921	2.293	0.853	Merck	Merck	0	0	0	0
Reuben SS	Manikantan P	An evaluation of the analgesic efficacy of intravenous regional anesthesia with lidocaine and ketorolac using a forearm versus upper arm tourniquet	Anesth Analg	0003-2999	2002	2009	80	12145071	3.069	2.332	no grants cited	no grants cited	0	0	0	0
Reuben SS	Maciolek H	Local administration of morphine for analgesia after iliac bone graft harvest	Anesthesiology	0003-3022	2001	2009	91	11506111	5.19	3.381	solely institutional	solely institutional	0	0	0	0
Reuben SS	Reuben JP	Brachial plexus anesthesia with verapamil and/or morphine	Anesth Analg	0003-2999	2000	2009	68	10910852	3.069	2.321	solely institutional	solely institutional	0	0	0	0
Reuben SS	Connelly NR	Postoperative analgesic effects of celecoxib or rofecoxib after spinal fusion surgery	Anesth Analg	0003-2999	2000	2009	101	11049912	3.069	2.321	solely institutional	solely institutional	0	0	0	0
Reuben SS	Maciolek H	Postoperative analgesia with controlled-release oxycodone for outpatient anterior cruciate ligament surgery.	Anesth Analg	0003-2999	1999	2009	118	10357331	3.069	2.509	no grants cited	no grants cited	0	0	0	0
Reuben SS	Connelly NR	Postarthroscopic meniscus repair analgesia with intraarticular ketorolac or morphine.	Anesth Analg	0003-2999	1996	2009	155	8610863	3.069	2.509	no grants cited	no grants cited	0	0	0	0
Revicki DA	McKenna SP	Psychometric characteristics of the ankylosing spondylitis quality of life questionnaire, short form 36 health survey, and functional assessment of chronic illness therapy-fatigue subscale.	Health Qual Life Outcomes	1477-7525	2009	2009	9	19183482	3.192	2.456	"withdrawn from public domain"	"withdrawn from public domain"	0	0	0	0
Reyes M	Verfaillie CM	Purification and ex vivo expansion of postnatal human marrow mesodermal progenitor cells	Blood	0006-4971	2001	2009	88	11675329	9.785	9.273	CA65493-01(31830904,174) F31AI/GM10291(?,1) Children's Cancer Research Fund; and the University of Minnesota Bone Marrow Transplant Research Fund; C.M.V. is a Scholar of the Leukemia Society of America	CA65493-01(31830904,174) F31AI/GM10291(?,1) Children's Cancer Research Fund; and the University of Minnesota Bone Marrow Transplant Research Fund; C.M.V. is a Scholar of the Leukemia Society of America	182936	237160	31830904	41265864
Richman RW	Diversé-Pierluissi MA	N-type Ca2+ channels as scaffold proteins in the assembly of signaling molecules for GABAB receptor effects.	J Biol Chem	0021-9258	2004	2011	84	15047708	5.117	6.355	NS37443(2346515,9) and a Hirschl Trust Fund Career award	and a Hirschl Trust Fund Career award	260724	316891	0	0
Rooney JW	Calame KL	TIF1beta functions as a coactivator for C/EBPbeta and is required for induced differentiation in the myelomonocytic cell line U937	Genes Dev	0890-9369	2001	2002	9	11711437	12.785	20.88	HL07343(6775993,73) GM29361(3467321,26) AI43567(596828,3)	HL07343(6775993,73) GM29361(3467321,26) AI43567(596828,3)	425123	551133	10840142	14053256	Y
Roovers K	Assoian RK	Nuclear translocation of LIM kinase mediates Rho-Rho kinase regulation of cyclin D1 expression	Dev Cell	1534-5807	2003	2006	33	12919678	14.202	14.807	CA72639(2353495,17) GM51878(1598985,10)	CA72639(2353495,17) GM51878(1598985,10)	298339	372266	3952480	4.93188e+06	Y
Roovers K	Assoian RK	Effects of rho kinase and actin stress fibers on sustained extracellular signal-regulated kinase activity and activation of G(1) phase cyclin-dependent kinases	Mol Cell Biol	0270-7306	2003	2006	37	12773570	5.766	8.142	CA72639(2353495,17) GM51878(1598985,10) and DAMD17-98-1-8209 from the Department of the Army	and DAMD17-98-1-8209 from the Department of the Army	298339	372266	0	0
Roy SN	Redman CM	Secretion of biologically active recombinant fibrinogen by yeast.	J Biol Chem	0021-9258	1995	1999	39	7559549	5.117	7.666	HL37457(2052652,15)	HL37457(2052652,15)	136843	206158	2052652	3.09237e+06	Y
Ruggiero KM	Lorenzo ML	Now you see it, now you don't: explicit versus implicit measures of the personal/group discrimination discrepancy	Psychol Sci	not found	2000	2002	16	11202499	6.157	not found	NIH and NSF grants not specified	NIH and NSF grants not specified	0	0	0	0
Ruggiero KM	Marx DM	Less pain and more to gain: why high-status group members blame their failure on discrimination.	J Pers Soc Psychol	not found	1999	2001	22	10531671	6.901	not found	MH58586-01(38707,2) and William F. Milton Fund	MH58586-01(38707,2) and William F. Milton Fund	19353.5	26671.3	38707	53342.7
Salter KH	Potti A	An integrated approach to the prediction of chemotherapeutic response in patients with breast cancer.	PLoS One	1932-6203	2008	2011	41	18382681	4.537	N/A	Funding from DoD and Jimmy V. foundation	Funding from DoD and Jimmy V. foundation	0	0	0	0
Sawada M	Matsuyama S	Ku70 suppresses the apoptotic translocation of Bax to mitochondria	Nat Cell Biol	1465-7392	2003	2007	48	12652308	20.116	20.268	CA78530(828927,6) and Blood Center Research Foundation, Northwest Mutual Foundation, Taiho Pharmaceutical Company Ltd.	CA78530(828927,6) and Blood Center Research Foundation, Northwest Mutual Foundation, Taiho Pharmaceutical Company Ltd.	138154	172388	828927	1.03433e+06
Sawada M	Matsuyama S	Cytoprotective membrane-permeable peptides designed from the Bax-binding domain of Ku70	Nat Cell Biol	1465-7392	2003	2007	48	12652309	20.116	20.268	Blood Center Research Foundation, Northwest Mutual Foundation, American Society of Hematology (Junior Faculty Award)	Blood Center Research Foundation, Northwest Mutual Foundation, American Society of Hematology (Junior Faculty Award)	0	0	0	0
Schon JH	Batlogg B	Efficient organic photovoltaic diodes based on doped pentacene	Nature	0028-0836	2000	2003	38	10667788	36.235	25.814	Deutsche Forschungsgemeinschaft	Deutsche Forschungsgemeinschaft	0	0	0	0
Schon JH	Batlogg B	An organic solid state injection laser	Science	0036-8075	2000	2002	28	10915617	32.452	23.872	Deutsche Forschungsgemeinschaft	Deutsche Forschungsgemeinschaft	0	0	0	0
Schon JH	Batlogg B	Fractional quantum hall effect in organic molecular semiconductors	Science	0036-8075	2000	2002	29	10875912	32.452	23.872			0	0	0	0
Schon JH	Batlogg B	A superconducting field-effect switch	Science	0036-8075	2000	2002	31	10784445	32.452	23.872	Deutsche Forschungsgemeinschaft	Deutsche Forschungsgemeinschaft	0	0	0	0
Schon JH	Batlogg B	Ambipolar pentacene field-effect transistors and inverters	Science	0036-8075	2000	2002	33	10669410	32.452	23.872	Deutsche Forschungsgemeinschaft	Deutsche Forschungsgemeinschaft	0	0	0	0
Schön JH	Lagües M	Superconductivity in CaCuO2 as a result of field-effect doping	Nature	0028-0836	2001	2003	16	11719801	36.235	27.955	no grants cited	no grants cited	0	0	0	0
Schön JH	Bao Z	Self-assembled monolayer organic field-effect transistors	Nature	0028-0836	2001	2003	17	11607026	36.235	27.955	no grants cited	no grants cited	0	0	0	0
Schön JH	Batlogg B	Superconductivity in single crystals of the fullerene C70	Nature	0028-0836	2001	2003	17	11677603	36.235	27.955	no grants cited	no grants cited	0	0	0	0
Schön JH	Cavellin C	Field-induced superconductivity in a spin-ladder cuprate	Science	0036-8075	2001	2003	20	11577230	32.452	23.329	One of us (F.C.B.) would like to thank the company WINTICI for financial support	One of us (F.C.B.) would like to thank the company WINTICI for financial support	0	0	0	0
Schön JH	Batlogg B	Gate-induced superconductivity in a solution-processed organic polymer film	Nature	0028-0836	2001	2003	24	11242074	36.235	27.955	no grants cited	no grants cited	0	0	0	0
Schön JH	Bao Z	Field-effect modulation of the conductance of single molecules	Science	0036-8075	2001	2002	11	11701891	32.452	23.329	no grants cited	no grants cited	0	0	0	0
Schön JH	Batlogg B	High-temperature superconductivity in lattice-expanded C60	Science	0036-8075	2001	2002	14	11533443	32.452	23.329	no grants cited	no grants cited	0	0	0	0
Schön JH	Batlogg B	Josephson junctions with tunable weak links	Science	0036-8075	2001	2002	19	11303093	32.452	23.329	no grants cited	no grants cited	0	0	0	0
Schön JH	Batlogg B	Universal crossover from band to hopping conduction in molecular organic semiconductors	Phys Rev Lett	0031-9007	2001	2002	20	11329338	7.013	6.668	No grants cited	No grants cited	0	0	0	0
Schön JH	Batlogg B	Superconductivity in molecular crystals induced by charge injection	Nature	0028-0836	2000	2003	20	10963589	36.235	25.814	Deutsche Forschungsgemeinschaft	Deutsche Forschungsgemeinschaft	0	0	0	0
Schön JH	Batlogg B	Superconductivity at 52 K in hole-doped C60	Nature	0028-0836	2000	2003	28	11117735	36.235	25.814	no grants cited	no grants cited	0	0	0	0
Schön JH	Batlogg B	A light-emitting field-effect transistor	Science	0036-8075	2000	2002	24	11062124	32.452	23.872	no grants cited	no grants cited	0	0	0	0
Schulz S	Nyce JW	Inhibition of protein farnesyltransferase: a possible mechanism of tumor prevention by dehydroepiandrosterone sulfate.	Carcinogenesis	0143-3334	1994	1995	6	7955120	5.203	4.118	Unavailable	No access from Penn	0	0	0	0
Schulz-Stübner S	Hata JS	A new rule for femoral nerve blocks	Reg Anesth Pain Med	1098-7339	2005	2006	9	16135352	3.479	2.595	Unavailable	article not found	0	0	0	0
Sekler I	Kopito RR	A cluster of cytoplasmic histidine residues specifies pH dependence of the AE2 plasma membrane anion exchanger.	Cell	0092-8674	1996	1997	12	8808628	34.774	36.242	GM38543(2154221,7) and was performed during the tenure of an Established Investigatorship of the American Heart Association	GM38543(2154221,7) and was performed during the tenure of an Established Investigatorship of the American Heart Association	307746	450329	2154221	3.1523e+06
Sezen B	Sames D	Selective and catalytic arylation of N-phenylpyrrolidine: sp3 C-H bond functionalization in the absence of a directing group	J Am Chem Soc	0002-7863	2005	2006	11	15826142	9.766	7.419	NIGMS grants not specified, also Pfizer, GSK, Merck, Bristol-Myers-Squibb	NIGMS grants not specified, also Pfizer, GSK, Merck, Bristol-Myers-Squibb	0	0	0	0
Sezen B	Sames D	Oxidative C-arylation of free (NH)-heterocycles via direct (sp3) C-H bond functionalization	J Am Chem Soc	0002-7863	2004	2006	17	15479077	9.766	6.903	NIGMS grants not specified, GlaxoSmithKline, and Merck Research Laboratories. D.S. is a recipient of the AstraZeneca Excellence in Chemistry Award. B.S. is a recipient of The Arun Guthikonda Memorial Fund graduate fellowship and the Bristol-Myers Squibb graduate fellowship	NIGMS grants not specified, GlaxoSmithKline, and Merck Research Laboratories. D.S. is a recipient of the AstraZeneca Excellence in Chemistry Award. B.S. is a recipient of The Arun Guthikonda Memorial Fund graduate fellowship and the Bristol-Myers Squibb graduate fellowship	0	0	0	0
Sezen B	Sames D	Diversity synthesis via C-H bond functionalization: concept-guided development of new C-arylation methods for imidazoles.	J Am Chem Soc	0002-7863	2003	2006	33	12940740	9.766	6.516	GM60326(2506271,17), GlaxoSmithKline, Johnson & Johnson, and Merck. D.S. is a recipient of an Alfred P. Sloan Fellowship and the Camille Dreyfus Teacher−Scholar Award	GM60326(2506271,17), GlaxoSmithKline, Johnson & Johnson, and Merck. D.S. is a recipient of an Alfred P. Sloan Fellowship and the Camille Dreyfus Teacher−Scholar Award	147428	183959	2506271	3.12731e+06
Sezen B	Sames D	Selective C-arylation of free (NH)-heteroarenes via catalytic C-H bond functionalization.	J Am Chem Soc	0002-7863	2003	2006	37	12720429	9.766	6.516	GM60326(2506271,17) GlaxoSmithKline, Johnson & Johnson, and Merck. D.S. is a recipient of the Alfred P. Sloan Fellowship, and the Camille Dreyfus Teacher-Scholar Award	GlaxoSmithKline, Johnson & Johnson, and Merck. D.S. is a recipient of the Alfred P. Sloan Fellowship, and the Camille Dreyfus Teacher-Scholar Award	147428	183959	0	0
Sezen B	Sames D	C-C bond formation via C-H bond activation: catalytic arylation and alkenylation of alkane segments.	J Am Chem Soc	0002-7863	2002	2006	43	12418875	9.766	6.201	GM60326(2506271,17) and GlaxoSmithKline. D.S. is a recipient of the Cottrell Scholar Award of Research Corp., Alfred P. Sloan Fellowship, and the Camille Dreyfus Teacher-Scholar Award	and GlaxoSmithKline. D.S. is a recipient of the Cottrell Scholar Award of Research Corp., Alfred P. Sloan Fellowship, and the Camille Dreyfus Teacher-Scholar Award	147428	188152	0	0
Shao ZM	Nguyen M	p53 mutation in plasma DNA and its prognostic value in breast cancer patients	Clin Cancer Res	1078-0432	2001	2002	13	11489795	7.508	5.076	Natural Science Foundation of China (30025015), the National Natural Science Foundation of China (39670803), Xia Li-Jun Research Foundation (Z-M. S.), and the California Breast Cancer Research Program	Natural Science Foundation of China (30025015), the National Natural Science Foundation of China (39670803), Xia Li-Jun Research Foundation (Z-M. S.), and the California Breast Cancer Research Program	0	0	0	0
Shen H	Kruh GD	Cellular and in vitro transport of glutathione conjugates by MRP.	Biochemistry	0006-2960	1996	1997	18	8639531	3.249	4.493	CA63173(789374,10) CA06927(143095033,1705) CA53893(4453340,19) Betz Foundation grant and an appropriation from Commonwealth of Pennsylvania and Fox Chase	CA53893(4453340,19) Betz Foundation grant and an appropriation from Commonwealth of Pennsylvania and Fox Chase	397250	581302	4453340	6.51664e+06
Shi M	Du C	DNA-PKcs-PIDDosome: a nuclear caspase-2-activating complex with role in G2/M checkpoint maintenance.	Cell	0092-8674	2009	2011	26	19203584	34.774	32.628	CA50519(6373425,107) CA92584(42638628,280), Stowers Institute for Medical Research, Austrian Science Fund project Y212B13, EU-RTN FP07—Apoptrain, and the Tyrolean Science Fund	CA50519(6373425,107) CA92584(42638628,280), Stowers Institute for Medical Research, Austrian Science Fund project Y212B13, EU-RTN FP07—Apoptrain, and the Tyrolean Science Fund	211846	226714	49012053	524519001
Shin JJ	Cabello FC	Localization of BmpA on the exposed outer membrane of Borrelia burgdorferi by monospecific anti-recombinant BmpA rabbit antibodies	Infect Immun	0019-9567	2004	2008	54	15039353	4.055	4.033	AI48856(1878937,17)	AI48856(1878937,17)	110526	134336	1878937	2.28371e+06	Y
Simmons WA	Taurog JD	A new MHC locus that influences class I peptide presentation.	Immunity	1074-7613	1997	1999	23	9390688	21.094	20.563	DK47692(924684,8) AR38319(5282223,26) AI28802(3987143,35) CA09082-20(1857104,50)	DK47692(924684,8) AR38319(5282223,26) AI28802(3987143,35) CA09082-20(1857104,50)	469808	672057	12051154	17239082	Y
Simmons WA	Taurog JD	Novel HY peptide antigens presented by HLA-B27.	J Immunol	0022-1767	1997	1999	26	9300696	5.859	7.145	DK47692(924684,8) AR38319(5282223,26) AI28802(3987143,35) CA09082-20(1857104,50) and a Pfizer scholarship	and a Pfizer scholarship	469808	672057	0	0
Simmons WA	Taurog JD	Rat MHC-linked peptide transporter alleles strongly influence peptide binding by HLA-B27 but not B27-associated inflammatory disease.	J Immunol	0022-1767	1996	1999	45	8568273	5.859	7.145	DK47692(924684,8) AR38319(5282223,26)		318748	466428	0	0	Y
Simmons WA	Breban M	Sharing of an HLA-B27-restricted H-Y antigen between rat and mouse.	Immunogenetics	0093-7711	1993	2000	80	8344721	2.716	2.899	Unavailable	No access from Penn	0	0	0	0
Smith T	DeWitt D	Arachidonic acid and nonsteroidal anti-inflammatory drugs induce conformational changes in the human prostaglandin endoperoxide H2 synthase-2 (cyclooxygenase-2)	J Biol Chem	0021-9258	2000	2004	38	11006278	5.117	7.368	GM57323(4416016,32)	GM57323(4416016,32)	138000	183996	4416016	5.88787e+06	Y
Sperber K	Kraus T	Induction of apoptosis by HIV-1-infected monocytic cells	J Immunol	0022-1767	2003	2005	34	12538722	5.859	6.702	AI45343(1755991,11) MH59724(19951556,84) AI45996(1403395,7) CA94108(2350319,31) AI44236(16256292,100) RR09145(249000,157) and the National Science Foundation Major Research Instrumentation Grant DB1-9724504	AI45343(1755991,11) MH59724(19951556,84) AI45996(1403395,7) CA94108(2350319,31) AI44236(16256292,100) RR09145(249000,157) and the National Science Foundation Major Research Instrumentation Grant DB1-9724504	837605	1.04516e+06	41966553	52365591
Stevenson M	Potti A	Characterizing the clinical relevance of an embryonic stem cell phenotype in lung adenocarcinoma.	Clin Cancer Res	1078-0432	2009	2012	27	19996213	7.508	6.768	NCI, but no grant numbers given	NCI, but no grant numbers given	0	0	0	0
Sticklen MB.		Plant genetic engineering for biofuel production: towards affordable cellulosic ethanol.	Nat Rev Genet	1471-0056	2008	2010	22	18487988	31.359	22.381	no grants cited	no grants cited	0	0	0	0
Sud N	Black SM	Caveolin 1 is required for the activation of endothelial nitric oxide synthase in response to 17beta-estradiol.	Mol Endocrinol	0888-8809	2010	2011	6	20610538	4.816	5.224	HL60190(1659345,94) HL67841(2586620,81) HL084739(1494069,24) HD057406(423024,26) F32HL090198(52898,18) HL097153(171306,3) and grant 0550133Z from the American Heart Association and an AHA postdoctoral fellowship	HL60190(1659345,94) HL67841(2586620,81) HL084739(1494069,24) HD057406(423024,26) F32HL090198(52898,18) HL097153(171306,3) and grant 0550133Z from the American Heart Association and an AHA postdoctoral fellowship	188150	198106	6387262	6.72523e+06
Sud N	Black SM	Protein kinase Cdelta regulates endothelial nitric oxide synthase expression via Akt activation and nitric oxide generation.	Am J Physiol Lung Cell Mol Physiol	1040-0605	2008	2011	45	18192589	4.29	4.061	HL60190(1659345,94) HL67841(2589220,81) HL72123(1137859,50) HL70061(1559111,54) and Fondation Leducq	HL72123(1137859,50) HL70061(1559111,54) and Fondation Leducq	101248	107968	2696970	2.87598e+06
Sullivan JC	Agah A	Elevated expression of isopeptide bond cross-links contributes to fibrosis in scleroderma and the healing wounds of tight skin mice.	Wound Repair Regen	1067-1927	2008	2010	24	19128265	2.911	2.556	no grants cited	no grants cited	0	0	0	0
Sun MF	Gailani D	Defective binding of factor XI-N248 to activated human platelets	Blood	0006-4971	2001	2007	77	11418471	9.785	9.273	HL58837(5079528,45) HL02917(413811,13) HL46213(7678684,77) HL56153(1034026,24) HL56914(5694995,49)	HL58837(5079528,45) HL02917(413811,13) HL56153(1034026,24)	403742	523415	6527365	8.46213e+06	Y
Sun W	Chantler PD	Cloning of the cDNA encoding a neuronal myosin heavy chain from mammalian brain and its differential expression within the central nervous system.	J Mol Biol	0022-2836	1992	1997	61	1569576	3.981	5.501	AR32858(490957,5) and Muscular Dystrophy Association of America	AR32858(490957,5) and Muscular Dystrophy Association of America	98191.4	160685	490957	803427
Sun X	Tian TX	Effect of burn injury on glucocorticoid receptor binding activity in rat muscle	J Surg Res	0022-4804	2004	2004	9	15013361	2.202	1.727	Grant #8700 from the Shriners Hospitals of North America	Grant #8700 from the Shriners Hospitals of North America	0	0	0	0
Sun X	TiaX TZ	Sepsis induces the transcription of the glucocorticoid receptor in skeletal muscle cells	Clin Sci (Lond)	0143-5221	2003	2004	15	12797863	4.181	2.117	grant #8700 from the Shriners Hospitals of North America	grant #8700 from the Shriners Hospitals of North America	0	0	0	0
Tanaka K	Yamada Y	A Krüppel-associated box-zinc finger protein, NT2, represses cell-type-specific promoter activity of the alpha 2(XI) collagen gene	Mol Cell Biol	0270-7306	2002	2009	53	12024037	5.766	8.84	NIH intramural funds; a Health Science Research Grant for Research on Human Genome, Tissue Engineering, and Food Biotechnology from the Ministry of Health, Labour, and Welfare, Japan; and a grant from the Japan Orthopaedics and Traumatology Foundation (no. 0116)	NIH intramural funds; a Health Science Research Grant for Research on Human Genome, Tissue Engineering, and Food Biotechnology from the Ministry of Health, Labour, and Welfare, Japan; and a grant from the Japan Orthopaedics and Traumatology Foundation (no. 0116)	0	0	0	0
Tchernof A	Després JP	Body fat distribution, the menopause transition, and hormone replacement therapy	Diabetes Metab	0338-1684	2000	2006	76	10705099	3.373	1.464	Unavailable	could not access full article	0	0	0	0
Thomas JM	Thomas FT	STEALTH matters: a novel paradigm of durable primate allograft tolerance	Immunol Rev	0105-2896	2001	2008	74	11782260	11.293	7	NIDDK, NIAID, and JDRF grants not specified	NIDDK, NIAID, and JDRF grants not specified	0	0	0	0
Thomas JM	Neville DM Jr.	Durable donor-specific T and B cell tolerance in rhesus macaques induced with peritransplantation anti-CD3 immunotoxin and deoxyspergualin: absence of chronic allograft nephropathy	Transplantation	0041-1337	2000	2006	74	10910269	3.689	4.035	AI22293(2664733,54) DK57958(13694133,26) and a CRADA from Novartis	AI22293(2664733,54) and a CRADA from Novartis	576044	768039	2664733	3.55288e+06
Thomas JM	Neville DM Jr	Peritransplant tolerance induction in macaques: early events reflecting the unique synergy between immunotoxin and deoxyspergualin.	Transplantation	0041-1337	1999	2008	104	10609942	3.689	3.463	AI22293(2664733,54) and a Novartis CRADA grant	and a Novartis CRADA grant	49346.9	68005.7	0	0
Tian H	McMahon AP	Dose dependency of Disp1 and genetic interaction between Disp1 and other hedgehog signaling components in the mouse	Development	0950-1991	2004	2005	16	15269168	7.091	7.149	NS33642(10106197,76)	NS33642(10106197,76)	132976	161623	10106197	12283336	Y
Tolentino MJ	Reich SJ	Intravitreal injection of vascular endothelial growth factor small interfering RNA inhibits growth and leakage in a nonhuman primate, laser-induced model of choroidal neovascularization	Retina	not found	2004	2004	6	15076954	3.052	not found	EY13410-01(663984,4) RPB Career Development Award and International Retinal Research Foundation	EY13410-01(663984,4) RPB Career Development Award and International Retinal Research Foundation	165996	201756	663984	807024
Tombler E	Diversé-Pierluissi MA	G protein-induced trafficking of voltage-dependent calcium channels.	J Biol Chem	0021-9258	2006	2011	65	16293615	5.117	5.808	NS37443(2346515,9) R24 CA095823(1293878,203) NSF DBI-9724504 and Hirschl Trust Fund Career Development Award	NSF DBI-9724504 and Hirschl Trust Fund Career Development Award	267098	304187	0	0
Tracy RB	Lieber MR	Transcription-dependent R-loop formation at mammalian class switch sequences	EMBO J	0261-4189	2000	2001	18	10698946	8.833	13.999	National Institute of Health grants and a Leukemia Society of America Scholar Award to M.R.L, and a Bank of America-Giannini Foundation Medical Research Fellowship to R.B.T. M.R.L. is the Rita and Edward Polusky Basic Cancer Research Professor	National Institute of Health grants and a Leukemia Society of America Scholar Award to M.R.L, and a Bank of America-Giannini Foundation Medical Research Fellowship to R.B.T. M.R.L. is the Rita and Edward Polusky Basic Cancer Research Professor	0	0	0	0
Tracy RB	Lieber MR	Stable RNA/DNA hybrids in the mammalian genome: inducible intermediates in immunoglobulin class switch recombination	Science	0036-8075	2000	2000	3	10807577	32.452	23.872	This work was supported by NIH grants to M.R.L. and C.-L.H. and by a Bank of America–Giannini fellowship and an ARCS Foundation fellowship to R.B.T. M.R.L. is the Rita and Edward Polusky Basic Cancer Research Professor	This work was supported by NIH grants to M.R.L. and C.-L.H. and by a Bank of America–Giannini fellowship and an ARCS Foundation fellowship to R.B.T. M.R.L. is the Rita and Edward Polusky Basic Cancer Research Professor	0	0	0	0
Trotochaud AE	Clark SE	CLAVATA3, a multimeric ligand for the CLAVATA1 receptor-kinase	Science	0036-8075	2000	2003	34	10915623	32.452	23.872	NSF (grant IBN-9816760)	NSF (grant IBN-9816760)	0	0	0	0
Uflacker R	Papamitisakis N	Interim report of the SENTIS trial: cerebral perfusion augmentation via partial aortic occlusion in acute ischemic stroke	J Cardiovasc Surg (Torino)	0021-9509	2008	2009	8	19043384	1.318	1.313	Unavailable	no Penn access	0	0	0	0
Urdaneta F	Lobato EB	Effects of a new phosphodiesterase enzyme type V inhibitor (UK 343-664) versus milrinone in a porcine model of acute pulmonary hypertension.	Ann Thorac Surg	0003-4975	2004	2011	75	15464509	3.503	2.244	no grants cited	no grants cited	0	0	0	0
Ushio-Fukai M	Alexander RW	cAbl tyrosine kinase mediates reactive oxygen species- and caveolin-dependent AT1 receptor signaling in vascular smooth muscle: role in vascular hypertrophy.	Circ Res	0009-7330	2005	2010	56	16151024	10.037	9.408	HL60728(3262612,30)<--other grants with 2R01HL060728-08A2 came up across several years and institutions, disregarded these HL058000(21246431,163) HL075209(7873644,62) and AHA scientist development grant 0130175N and an American Heart Association Grant-in-Aid 0555308B	<--other grants with 2R01HL060728-08A2 came up across several years and institutions, disregarded these and AHA scientist development grant 0130175N and an American Heart Association Grant-in-Aid 0555308B	108754	127851	0	0
Van Parijs L	Baltimore D	Autoimmunity as a consequence of retrovirus-mediated expression of C-FLIP in lymphocytes.	Immunity	1074-7613	1999	2009	112	10626898	21.094	20.563	CA54162(?,4) AI42100(1931022,3) HHMI Predoctoral Fellowship, Arthritis Foundation Postdoctoral Fellowhip	CA54162(?,4) AI42100(1931022,3) HHMI Predoctoral Fellowship, Arthritis Foundation Postdoctoral Fellowhip	643674	887057	1931022	2.66117e+06
Van Parijs L	Baltimore D	Uncoupling IL-2 signals that regulate T cell proliferation, survival, and Fas-mediated activation-induced cell death.	Immunity	1074-7613	1999	2009	115	10514006	21.094	20.563	GM57931(1852287,9) AI42100(1931022,3) AI35297(20926096,105) CA51462(?,4), HHMI Predoctoral Fellowship, Arthritis Foundation Postdoctoral Fellowship, DoD	GM57931(1852287,9) AI35297(20926096,105) CA51462(?,4), HHMI Predoctoral Fellowship, Arthritis Foundation Postdoctoral Fellowship, DoD	1.04878e+06	1.44534e+06	22778383	31391237
Van Parijs L	Abbas AK	The Fas/Fas ligand pathway and Bcl-2 regulate T cell responses to model self and foreign antigens.	Immunity	1074-7613	1998	2009	134	9492007	21.094	20.563	AI35297(20926096,105) AI32531(2102037,19) AI22033(5817481,9) HL07627(10216216,73)	AI32531(2102037,19) AI22033(5817481,9) HL07627(10216216,73)	1.09626e+06	1.54415e+06	18135734	25545127	Y
Van Parijs L	Abbas AK	Role of interleukin 12 and costimulators in T cell anergy in vivo.	J Exp Med	0022-1007	1997	2009	139	9314560	14.665	15.651	AI35297(20926096,105) AI25022(2598349,26) HL07627(10216216,73) RR00121(349550,2)<--only 1 from PubMed search but did not include this paper and a National Cancer Institute training grant	AI25022(2598349,26) RR00121(349550,2)<--only 1 from PubMed search but did not include this paper and a National Cancer Institute training grant	613956	878259	2947899	4.21695e+06
van Son JA	Mohr FW	Ross-Konno operation with resection of endocardial fibroelastosis for critical aortic stenosis with borderline-sized left ventricle in neonates.	Ann Thorac Surg	0003-4975	1997	1997	5	8993251	3.503	2.022	no grants cited	no grants cited	0	0	0	0
Venters HD	Kelley KW	A new mechanism of neurodegeneration: a proinflammatory cytokine inhibits receptor signaling by a survival peptide.	Proc Natl Acad Sci U S A	0027-8424	1999	2009	120	10449788	10.472	10.26	AG06246(1981864,41) DK49311(1229056,38) MH51569(3884624,63) the University of Illinois, Urbana-Champaign/Centre National de la Recherche Scientifique Research Award Program, and the Pioneering Research Project in Biotechnology financed by the Japanese Ministry of Agriculture, Forestry, and Fisheries	AG06246(1981864,41) DK49311(1229056,38) MH51569(3884624,63) the University of Illinois, Urbana-Champaign/Centre National de la Recherche Scientifique Research Award Program, and the Pioneering Research Project in Biotechnology financed by the Japanese Ministry of Agriculture, Forestry, and Fisheries	142342	196164	7095544	9.77848e+06
Walker TS	Vivanco JM	Metabolic profiling of root exudates of Arabidopsis thaliana.	J Agric Food Chem	0021-8561	2003	2009	78	12696935	3.239	2.102	Colorado State University Agricultural Experiment Station and the Colorado State University-Invasive Weeds Initiative. J.M.V. is an NSF Early Career Development Faculty Fellow	Colorado State University Agricultural Experiment Station and the Colorado State University-Invasive Weeds Initiative. J.M.V. is an NSF Early Career Development Faculty Fellow	0	0	0	0
Wang H	Raizada MK	Angiotensin I-converting enzyme antisense gene therapy causes permanent antihypertensive effects in the SHR	Hypertension	0194-911X	2000	2002	33	10642298	6.643	5.311	HL52189(927423,25) HL56921(9953331,57) and a grant-in-aid from the American Heart Association, Florida-Puerto Rico affiliate	and a grant-in-aid from the American Heart Association, Florida-Puerto Rico affiliate	211717	282282	0	0
Wang L	Moore DD	Orphan receptor small heterodimer partner is an important mediator of glucose homeostasis	Mol Endocrinol	0888-8809	2006	2008	22	16803864	4.816	4.967	P20RR016475(36886705,496) R01DK53366(2425477,16) P01DK57743(4339029,14) R01DK67536(2771567,53) R01HL51586(6216421,108) DK68037(2073369,33) and Kansas Masonic Cancer Research Institute and American Liver Foundation	P20RR016475(36886705,496) R01DK53366(2425477,16) P01DK57743(4339029,14) R01DK67536(2771567,53) R01HL51586(6216421,108) DK68037(2073369,33) and Kansas Masonic Cancer Research Institute and American Liver Foundation	708574	806966	54712568	62309907
Weiser WY	David JR	Recombinant human migration inhibitory factor has adjuvant activity.	Proc Natl Acad Sci U S A	0027-8424	1992	1997	52	1518830	10.472	10.26	AI22801(680233,5) AI22532(1787228,21)	AI22532(1787228,21)	221153	361905	1787228	2.92471e+06	Y
Wong CW	Cheskis BJ	Estrogen receptor-interacting protein that modulates its nongenomic activity-crosstalk with Src/Erk phosphorylation cascade	Proc Natl Acad Sci U S A	0027-8424	2002	2009	81	12415108	10.472	10.7	no grants cited	no grants cited	0	0	0	0
Wyman JL	Garfinkel MR	Immunoisolating pancreatic islets by encapsulation with selective withdrawal.	Small	1613-6810	2007	2010	44	17340661	8.262	6.419	NSF, American Diabetes Assoc, Burroughs Wellcome; grant#s not indicated	NSF, American Diabetes Assoc, Burroughs Wellcome; grant#s not indicated	0	0	0	0
Xiong W	Chan L	Transgenic mice expressing full-length human apolipoprotein B-100. Full-length human apolipoprotein B mRNA is essentially not edited in mouse intestine or liver.	J Biol Chem	0021-9258	1992	1993	10	1400454	5.117	7.666	HL27341(10163276,94) HL45516(387552,3) grant from March of Dimes Birth Defects Foundatio and fellowship from Heart and Stroke Foundation of Canada	HL27341(10163276,94) HL45516(387552,3) grant from March of Dimes Birth Defects Foundatio and fellowship from Heart and Stroke Foundation of Canada	237304	388336	10550828	17265907
Xu Y	Damron DS	Sphingosylphosphorylcholine is a ligand for ovarian cancer G-protein-coupled receptor 1	Nat Cell Biol	1465-7392	2000	2006	70	10806476	20.116	11.939	American Cancer Society grant RPG-99-062-01-CNE, an American Cancer Society OHIO Division grant, US Army grant DAMD 17-99-1-9563 to Y.X. and by Betsey De Windt endowment funds	American Cancer Society grant RPG-99-062-01-CNE, an American Cancer Society OHIO Division grant, US Army grant DAMD 17-99-1-9563 to Y.X. and by Betsey De Windt endowment funds	0	0	0	0
Yang R	Chen Y	Single-walled carbon nanotubes-mediated in vivo and in vitro delivery of siRNA into antigen-presenting cells	Gene Ther	0969-7128	2006	2007	6	16838032	4.143	4.782	Chinese gov't funding	Chinese gov't funding	0	0	0	0
Yao ZQ	Prince AM	gC1qR expression in chimpanzees with resolved and chronic infection: potential role of HCV core/gC1qR-mediated T cell suppression in the outcome of HCV infection	Virology	0042-6822	2006	2007	20	16368125	3.249	3.525	R01AI47349(2486483,14) R01DK066754(1473614,8) R01AZ057591(?,1) <- likely a typo so substituted AI057591(1452139,7) which has Hahn YS as PI	R01AI47349(2486483,14) R01DK066754(1473614,8) R01AZ057591(?,1) <- likely a typo so substituted AI057591(1452139,7) which has Hahn YS as PI	569256	648303	5412236	6.16377e+06	Y
Yao ZQ	Hahn YS	SOCS1 and SOCS3 are targeted by hepatitis C virus core/gC1qR ligation to inhibit T-cell function	J Virol	0022-538X	2005	2006	8	16306613	5.324	5.178	DK066754(1473614,8) DK063222(2023251,9) AZ066328(?,?) and American Association for the Study of Liver Diseases/Schering Advanced Hepatology fellowship	DK063222(2023251,9) AZ066328(?,?) and American Association for the Study of Liver Diseases/Schering Advanced Hepatology fellowship	409007	480828	2023251	2.37853e+06
Ying LQ	Branchaud BP	Facile synthesis of symmetric, monofunctional cyanine dyes for imaging applications.	Bioconjug Chem	1043-1802	2011	2011	5	21517120	5.224	5.224	no grants cited	no grants cited	0	0	0	0
Yun TH	Leung LL	Thrombin activation of factor XI on activated platelets requires the interaction of factor XI and platelet glycoprotein Ib alpha with thrombin anion-binding exosites I and II, respectively	J Biol Chem	0021-9258	2003	2007	46	12968031	5.117	6.482	HL57530(4188349,26) HL46213(7678684,77) HL64943(6536968,52) HL70683(1500000,17) P5065967(?,?) ; an American Heart Association scientist development award (to T. M.); the Cheong Har Family Foundation; the Janet Hughes Fund; and the Francis and Arjay Miller Fund	HL57530(4188349,26) HL46213(7678684,77) HL64943(6536968,52) HL70683(1500000,17) P5065967(?,?) ; an American Heart Association scientist development award (to T. M.); the Cheong Har Family Foundation; the Janet Hughes Fund; and the Francis and Arjay Miller Fund	474760	592402	19904001	24836083
Zhang B	Wang S	Requirement for chromatin-remodeling complex in novel tumor suppressor HIC1-mediated transcriptional repression and growth control.	Oncogene	0950-9232	2009	2011	20	19015639	6.889	6.73	CA102940(161500,4) CA101992(2118991,15), Susan G. Komen Breat Cancer Foundation Research Award BCTR0403163, Karin Grunebaum Cancer Research Foundation, Carter Family Foundation for Melanoma Research, Congressionally Directed Medical Research Program, Bosto	CA102940(161500,4) CA101992(2118991,15), Susan G. Komen Breat Cancer Foundation Research Award BCTR0403163, Karin Grunebaum Cancer Research Foundation, Carter Family Foundation for Melanoma Research, Congressionally Directed Medical Research Program, Bosto	181641	194389	2280491	2.44054e+06
Zhang B	Wang S	HIC1 regulates tumor cell responses to endocrine therapies.	Mol Endocrinol	0888-8809	2009	2011	21	19819984	4.816	5.33	CA102940(161500,4) CA101992(2118991,15), Susan G. Komen Breat Cancer Foundation Research Award BCTR0403163, Karin Grunebaum Cancer Research Foundation, Carter Family Foundation for Melanoma Research, Congressionally Directed Medical Research Program, Boston University School of Medicine Department of Medicine Pilot Project Grant Award, and Aid for Cancer Research grant.	Susan G. Komen Breat Cancer Foundation Research Award BCTR0403163, Karin Grunebaum Cancer Research Foundation, Carter Family Foundation for Melanoma Research, Congressionally Directed Medical Research Program, Boston University School of Medicine Department of Medicine Pilot Project Grant Award, and Aid for Cancer Research grant.	181641	194389	0	0
Zhu K	Xu Y	Sphingosylphosphorylcholine and lysophosphatidylcholine are ligands for the G protein-coupled receptor GPR4	J Biol Chem	0021-9258	2001	2005	49	11535583	5.117	7.258	CA84038-01(222000,8) CA76204(1983525,14) American Cancer Society Grant RPG-99-062-01-CNE and United States Army Grant DAMD 17-99-1-9563	American Cancer Society Grant RPG-99-062-01-CNE and United States Army Grant DAMD 17-99-1-9563	169430	219651	0	0
Zou Z	Buck LB	Combinatorial effects of odorant mixes in olfactory cortex.	Science	0036-8075	2006	2010	54	16527983	32.452	30.028	HHMI and NIH and DoD grants not specified	HHMI and NIH and DoD grants not specified	0	0	0	0
Zou Z	Buck LB	Odor maps in the olfactory cortex.	Proc Natl Acad Sci U S A	0027-8424	2005	2010	65	15911779	10.472	10.231	HHMI and NIH and DoD grants not specified	HHMI and NIH and DoD grants not specified	0	0	0	0
Zou Z	Buck LB	Genetic tracing reveals a stereotyped sensory map in the olfactory cortex	Nature	0028-0836	2001	2008	76	11700549	36.235	27.955	Howard Hughes Medical Institute, grants from the National Institutes of Health and the Department of Defense (L.B.B.), a Howard Hughes Predoctoral Fellowship (L.F.H.), the Fyssen Foundation (J.-P.M.) and the Alice and Joseph Brook Fund (J.-P.M.)	Howard Hughes Medical Institute, grants from the National Institutes of Health and the Department of Defense (L.B.B.), a Howard Hughes Predoctoral Fellowship (L.F.H.), the Fyssen Foundation (J.-P.M.) and the Alice and Joseph Brook Fund (J.-P.M.)	0	0	0	0
Zuo L	Alexander RW	Caveolin-1 is essential for activation of Rac1 and NAD(P)H oxidase after angiotensin II type 1 receptor stimulation in vascular smooth muscle cells: role in redox signaling and vascular hypertrophy.	Arterioscler Thromb Vasc Biol	1079-5642	2005	2011	68	15976327	7.037	7.053	HL60728(3262612,30)<--other grants with 2R01HL060728-08A2 came up across several years and institutions, disregarded these HL058000(21246431,163) HL075209(7873644,62)	HL60728(3262612,30)<--other grants with 2R01HL060728-08A2 came up across several years and institutions, disregarded these HL058000(21246431,163) HL075209(7873644,62)	108754	127851	3262612	3.83552e+06	Y
Zuo L	Alexander RW	Microtubules regulate angiotensin II type 1 receptor and Rac1 localization in caveolae/lipid rafts: role in redox signaling.	Arterioscler Thromb Vasc Biol	1079-5642	2004	2011	82	15142861	7.037	7.432	HL60728(3262612,30) and an American Heart Association national scientist development grant	and an American Heart Association national scientist development grant	108754	132182	0	0
										Attributable funds	Attributable funds, 2012 dollars
									Total	4.69331e+07	5.84947e+07
									Median	209324	239381
									Minimum	5447.32	7061.95
									Maximum	3.16871e+06	3.60871e+06
									Mean	314987	392582
									Standard Deviation	360962	423256
									N	149	149
										Attributable funds, all NIH funding and accounted for	Attributable funds, all NIH funding and accounted for, 2012 dollars
									Total	1.43878e+07	1.82781e+07
									Median	286995	361905
									Minimum	35088	38853.7
									Maximum	1.09626e+06	1.54415e+06
									Mean	334599	425073
									Standard Deviation	252928	329083
									N	43	43
										All grants summed	All grants summed, 2012 dollars
									Total	1668680136	2.32491e+09
