# Supplementary material for: Financial costs and personal consequences of research misconduct resulting in retracted publications
Source: eLife. 2014 Aug 14;3:e02956. doi: 10.7554/eLife.02956 (PMC4132287; doi:10.7554/eLife.02956)
Supplement: Figure 3—source data 1. — DOI: http://dx.doi.org/10.7554/eLife.02956.006 [file elife02956s002.xlsx]

## Sheet: Sheet1
Last Name	First Name	Institution	ORI Report	Misconduct	Total funding pre-ORI	Total funding post-ORI	2012	2011	2010	2009	2008	2007	2006	2005	2004	2003	2002	2001	2000	1999	1998	1997	1996	1995	1994	1993	1992
Abbs	James	U of Wisconsin - Madison	1996	fraud	0	0
Angelides	Kimon	Baylor	1999	fraud	2.36434e+06	0																			895025	761079	708239
Arnold	Steven	Tulane	2001	fraud	0	0
August	Gerald	U of Minnesota	1994	plagiarism	1.20945e+06	1.70613e+07	864010	897480	1.40709e+06	979639	1.43036e+06	1.57615e+06	1.67254e+06	1.13296e+06	1.02378e+06	488748	963131	920623	1.13304e+06	948435	933753		97601.6	591977	506207	600329	609124
Bednarik	Daniel	CDC	1995	fraud	0	0
Boone	James	U of Missouri Columbia	1997	fraud	0	0
Brodie	Scott	U of Washington	2010	fraud	1.18048e+06	0											825778	354697
Cheskis	Boris	Wyeth	2010	fraud	0	0
Clayton	Gloria	Med Coll Georgia	1995	fraud	0	0
Contreras	Juan Luis	UAB	2009	fraud	3.5586e+06	0					50419.3	923012	1.50354e+06	724463	176237	180930
Dreyer	Evan	Harvard (MGH)	2000	fraud	1.40215e+06	0															207694	205628	250484	241706	244972	251662
Duan	Lingxun	Thomas Jefferson	2000	fraud	0	0
Elton	Terry	Ohio State U	2012	fraud	4.56504e+06	0			239058	488392	271806	282243	298951	263628	272559	273267	279495		256091	256987	255014	260739	148080	151639	173991	192471	200632
Farooqui	Jamal	U of Cincinnati	1996	plagiarism	292981	616257															311834	304423	299180	292981
Fogel	Robert	Harvard	2009	fraud	1.40506e+06	0									162770	652099	170913	173615	185922	59738.5
Fossel	Eric	Harvard	1996	fraud	0	0
Francis	Peter	Oregon Health & Science U	2012	fraud	1.24658e+06	0		1.24658e+06
Freisheim	James	Medical College of Ohio	1993	fraud (data theft)	390706	0																					390706
Friedman	Andrew	Harvard (Brigham and Womens)	1996	fraud	0	0
Ganz	Michael	Case Western Reserve	2002	fraud	0	0
Geisler	Hans	Saint Vincent Hospital	2005	fraud	0	0
Gelband	Craig	U of Florida	2003	fraud	1.35935e+06	0												251278	457584	123716	121586	118728	192148			47507.7	46802.5
Goodwin	Elizabeth	U of Wisconsin - Madison	2010	fraud	4.41891e+06	0								781539	424427	435729	434932	345227	352748	376735	372024	280305	271240	297205			46802.5
Hartzer	Michael	Oakland U	2000	fraud	1.62252e+06	0																270600	266161	263482	299947	262438	259896
Hauser	Marc	Harvard	2012	fraud	859154	0								263169	272085	323900
Herman	Terence	Harvard (Dana Farber)	1995	fraud	767944	0																					767944
Hiserodt	John	U of Pittsburgh	1994	fraud	0	0
Ho	John	Cornell	1999	fraud	1.37424e+06	2.5933e+06							219096	492055	372527		613632	439483	456507	341610	722797	328975	322468
Imam	S. Ashraf	USC	1997	fraud	362791	0																		181110	181681
Ivatt	Raymond	Cetus	1993	fraud	0	0
Jacoby	David	Harvard (MGH)	2001	fraud	553162	0														152728	156101	128593	115739
June	Harry	Indiana U, Purdue	1995	falsified letters of recommendation	0	4.66224e+06	334483	346018	371350	566796	229937		252711	268338	278621	287217	310554	377936	359048	384757	140599	153878
Kammer	Gary	Wake Forest	2005	fraud	5.12942e+06	0										820659	825046	810336	482939	484632	480912	481620	250840	248311	244126
Landay	Alan	Rush-Presbyterian	1995	plagiarism	1.01581e+06	2.84505e+07	2900966	3.13043e+06	3.23876e+06	3.17258e+06			2.63171e+06	2.98779e+06	3.1072e+06	2.21966e+06	1.5488e+06	1.38082e+06		503363	655198	483076	490152			508304	507503
Leadon	Steven	UNC Chapel Hill	2006	fraud	3.55396e+06	0											1.28	436183	390140	326916	289224	472492	476351	196438	449646	259551	257014
Leisman	Gerald	New York Chiropractic College	1994	misrepresented credentials	0	0
Liburdy	Robert	Lawrence Berkeley Laboratory	1999	fraud	3.16666e+06	0																497190	710931	400669	749332	392251	416288
Lin	James	U of Illinois Chicago	2006	fraud	0	0
Linn	James	Tennessee State U	2010	fraud	0	0
London	Jill	U of Connecticut	1997	fraud	0	0
Lupu	Ruth	Georgetown	1995	falsified letter of collaboration	1.31794e+06	6.44377e+06	461186		322707	797069	762362	779322	801608	489924			271687	284289	284454	429829		255848	503481	485888	622973	357606	337361
Lushington	Gerald	Kansas U	2011	plagiarism	0	0
Miller	Michael	SUNY Upstate	2012	fraud	1.62507e+07	0		752878	2.58558e+06	2.30025e+06	653181	678260	718413	759435	785165	359977	472318	655524	653623	913080	889902	916398	572252	563973	573678	226056	220778
Muchowski	Paul	UCSF	2012	fraud	5.99903e+06	0	1748930	380268	834934	965624	1.25259e+06	884046	936380	366390	378803
Nguyen	Mai	UCLA	2008	fraud	255506	0								150541							104965
Ningaraj	Nagendra	Vanderbilt	2009	fraud	0	0
Ninnemann	John	U of Utah/UCSD	1994	fraud	0	0
Padgett	David	Ohio State U	2001	fraud and plagiarism	409432	136470											136470	134588	134387	134858	140186
Pandurangi	Raghoottama	U of Missouri Columbia	2001	fraud and plagiarism	0	0
Paparo	Anthony	Southern Illinois U	1993	fraud	0	0
Paquette	Leo	Ohio State U	1993	plagiarism	964148	3.7461e+06										344939	443493	406219	347400		100872	360002	353158	709509	680508	680040	964148
Poehlman	Eric	U of Vermont	2005	fraud	5.74762e+06	0													780894	1.16726e+06	875524	1.12027e+06	654088	112558	392389	385230	259404
Poisson	Roger	St. Luc Hospital	1993	fraud	0	0
Prasad	M. Renuka	U of Kentucky	2002	fraud	278096	0															278096
Radolf	Justin	U of Connecticut	2003	fraud	1.02021e+07	9.0787e+06	1019147	1.04892e+06	1.09295e+06	1.09396e+06	1.07565e+06	579728	889930	878274	1.40015e+06	1.41097e+06	1.41459e+06	403792	1.27356e+06	1.48115e+06	1.27887e+06	1.29162e+06	1.46504e+06	386712	416851	431777	358160
Ravindranath	Mepur	John Wayne Cancer Inst	2012	fraud	614437	0							188967	310734	114736
Reisine	Terry	Penn	1998	fraud	2.93066e+06	329153								137662	191490									888887	871810	586184	583779
Robinson	Clifford	U of Delaware	2006	fraud	135729	0														135729
Rosales	Oscar	Yale	1995	plagiarism	0	0
Roy	Samar	New York Blood Ctr	1999	fraud	0	0
Ruggiero	Karen	Harvard	2001	fraud	54520.8	0															54520.8
Shapiro	David	St Jude	1997	fraud and misrepresented credentials	0	0
Sherer	Michael	NIH	1993	fraud	0	0
Siddiqui	Farooq	Roswell Park Cancer Inst	1995	fraud	0	0
Smart	Eric	U of Kentucky	2012	fraud	8.64211e+06	0			374446	686429	683987	519809	1.03886e+06	555061	439984	854868	1.14088e+06	678045	836523	441091	139547	138457		43086.5	36716.4	34319.9
Sperber	Kirk	Mt Sinai	2008	fraud	2.37632e+06	0								335639	360526		276714	272901	272493		175001	177463	173177	166088	166322
Stricker	Raphael	UCSF	1993	fraud	0	0
Sudbø	Jon	Norwegian Radium Hospital	2007	fraud	0	0
Sultan	Ali	Harvard	2004	fraud and plagiarism	895557	0									393312	403786	412988						41119.1	37663.1
Surprenant	Annmarie	Oregon Health Sci U	1994	misrepresented credentials	395996	0																					395996
Thiruchelvam	Mona	UMDNJ	2012	fraud	825488	0			91679.2	375634	358174
Thomas	Judith	UAB	2009	fraud	2.94638e+07	0						1.4013e+06	3.22692e+06	3.34539e+06	1.51652e+06	1.53433e+06	3.55123e+06	3.03965e+06	2.76184e+06	2.98198e+06	1.13721e+06	1.1105e+06	1.09229e+06	1.20302e+06	540671	506718	514259
Van Parijs	Luk	Harvard, MIT, Cal Tech	2008	fraud	704947	0									704947
Visvanathan	Mahesh	Kansas U	2011	plagiarism	0	0
Wang	Sheng	Boston U	2011	fraud	378696	0			179791						98145.7	100759
Washabaugh	Michael	Johns Hopkins	1996	fraud																					388060	197003	194343
Weber	Scott	U of Pittsburgh	2011	fraud	0	0
Xiong	Momiao	UTHSC Houston	2001	fraud and plagiarism	0	1.43121e+06	361463	481924	284135	303686
Yao	Zhenhai	UNC Chapel Hill	2002	fraud	1.25924e+06	0											1.28	832056	151304	156390	119493
